# Supplementary material for: The AlpArray Seismic Network: A Large-Scale European Experiment to Image the Alpine Orogen
Source: Surv Geophys. 2018 Apr 18;39(5):1009–33. doi: 10.1007/s10712-018-9472-4 (PMC6428228; doi:10.1007/s10712-018-9472-4)
Supplement: Supplementary file 2 — Supplementary material 2 (XLS 155 kb) [file 10712_2018_9472_MOESM2_ESM.xls]

## Sheet: AlpArray_perm.sta.
Network code	Station name	Latitude [° WGS84]	Longitude [° WGS84]	Elevation [km]	Depth of sensor below ground [m]	Site Name	StartTime	EndTime	Country of deployment	Sensor type	Sensor lower corner period [s]	Digitizer type	Sampling rate	Station owner	Station operator	online/offline	EIDA node for data distribution [BGR; ETH; GFZ; INGV; LMU; ORFEUS; RESIF]	PSD PDF availability [yes+PQLX; yes+other software; no]	Notes
BW	BE1	47.9108	11.2213	0.746		Monatzhausen - BY	2011-05-13T00:00:00		DE	Trillium_Compact	120	Reftek_130	200	LMU Muenchen	LMU Muenchen & State of Bavaria	online	LMU	yes+ObsPy	HH? channels named HH? since 2015.10.21.
BW	FFB1	48.1629	11.2751	0.572	89	Fürstenfeldbruck Bohrloch - BY	2015-07-31T00:00:00		DE	Trillium_120PH	120	Centaur	200	LMU Muenchen	LMU Muenchen	online	LMU	yes+ObsPy	HH? channels named HH? since 2015.10.21.
BW	KW1	48.1219	12.5972	0.514		Garching a.d. Alz - BY	2010-12-02T10:00:00		DE	Trillium_Compact	120	Reftek_130	200	LMU Muenchen	LMU Muenchen & State of Bavaria	online	LMU	yes+ObsPy	HH? channels named HH? since 2015.10.21.
BW	MANZ	49.9862	12.1083	0.635		Manzenberg - BY	2006-01-11T00:00:00		DE	STS-2	120	M24	200	LMU Muenchen	LMU Muenchen & State of Bavaria	online	LMU	yes+ObsPy	HH? channels named HH? since 2015.10.21.
BW	RJOB	47.7372	12.7957	0.86		Jochberg - BY	2014-11-26T10:30:00		DE	STS-2	120	Reftek_130	200	LMU Muenchen	LMU Muenchen & State of Bavaria	online	LMU	yes+ObsPy	HH? channels named HH? since 2015.10.21.
BW	RNON	47.7405	12.8671	0.555			2017-05-19T11:20:00		DE	Trillium_Compact	120	M24	200	LMU Muenchen	LMU Muenchen & State of Bavaria	online	LMU	yes+ObsPy
BW	ROTZ	49.7669	12.207	0.43		Rotzenmühle - BY	2006-02-08T00:00:00		DE	STS-2	120	M24	200	LMU Muenchen	LMU Muenchen & State of Bavaria	online	LMU	yes+ObsPy	HH? channels named HH? since 2015.10.21.
BW	RTBE	47.7451	12.8241	1.16		Bürgeleck - BY	2017-05-29T13:00:00		DE	Trillium_Compact	120	Reftek_130	200	LMU Muenchen	LMU Muenchen	online	LMU	yes+ObsPy
BW	SCE	47.0378	11.709	1.73		Schlegeis Speicher - OE	2013-04-24T13:00:00		DE	STS-2	120	M24	200	LMU Muenchen	LMU Muenchen	online	LMU	yes+ObsPy	HH? channels named HH? since 2015.10.21.
BW	ZUGS	47.4163	10.9788	2.65		Zugspitze - BY	2017-08-10T13:00:00		DE	CMG-3T	60	CMG_DM24	200	LMU Muenchen	LMU Muenchen	online	LMU	yes+ObsPy
CH	ACB	47.5876	8.25434	0.47		Klingnau - Acheberg - AG	1983-11-17T10:00:00		CH	Trillium_Compact	120	Taurus	200	SED	SED	online	ETH	yes+PQLX
CH	AIGLE	46.3416	6.95336	0.775		Aigle - VD	1998-04-14T00:00:00		CH	STS-2	120	HRD-24	120	SED	SED	online	ETH	yes+PQLX
CH	BALST	47.3358	7.69498	0.863		Balsthal - SO	2000-06-16T00:00:00		CH	STS-2	120	HRD-24	120	SED	SED	online	ETH	yes+PQLX
CH	BERGE	47.8716	8.17798	0.963		Lenzkirch - Germany	2012-10-01T00:00:00		CH	Trillium_Compact	120	Taurus	200	SED	SED	online	ETH	yes+PQLX
CH	BERNI	46.4136	10.0231	2.313		Berninapass - GR	1998-04-14T00:00:00		CH	STS-2	120	HRD-24	120	SED	SED	online	ETH	yes+PQLX
CH	BNALP	46.8705	8.42502	1.54		Bannalp - NW	1998-04-14T00:00:00		CH	STS-2	120	HRD-24	120	SED	SED	online	ETH	yes+PQLX
CH	BOURR	47.3938	7.23018	0.843		Bourrignon - JU	1998-04-14T00:00:00		CH	STS-2	120	Trident	120	SED	SED	online	ETH	yes+PQLX
CH	BRANT	46.938	6.47298	1.145		Les Verrieres - NE	2002-10-10T18:42:00		CH	STS-2	120	Trident	120	SED	SED	online	ETH	yes+PQLX
CH	DAGMA	47.2309	8.01248	0.56		Dagmersellen - Lutertal - LU	2013-04-11T00:00:00		CH	Trillium_Compact	120	Taurus	200	SED	SED	online	ETH	yes+PQLX
CH	DAVOX	46.7805	9.87952	1.83		Davos - Dischmatal - GR	2002-07-24T00:00:00		CH	STS-2	120	Trident	120	SED	SED	online	ETH	yes+PQLX
CH	DIX	46.0801	7.40815	2.41		Grande Dixence - VS	1976-12-14T00:00:00		CH	STS-2	120	HRD-24	120	SED	SED	online	ETH	yes+PQLX
CH	EMBD	46.2165	7.83223	1.18		Mattertal - VS	2009-10-29T00:00:00		CH	Trillium_40	40	Taurus	120	SED	SED	online	ETH	yes+PQLX
CH	EMING	47.8952	8.84676	0.619		Emmingen - Germany	2013-07-30T00:00:00		CH	Trillium_Compact	120	Taurus	200	SED	SED	online	ETH	yes+PQLX
CH	EMMET	47.4376	8.01358	0.74		Emmethof - AG	2012-08-16T00:00:00		CH	Trillium_Compact	120	Taurus	200	SED	SED	online	ETH	yes+PQLX
CH	FIESA	46.4353	8.11043	2.338		Fiescheralp - VS	2009-11-12T00:00:00		CH	STS-2	120	Trident	120	SED	SED	online	ETH	yes+PQLX
CH	FUORN	46.6202	10.2635	2.333		Ofenpass-Fuorn - GR	2000-09-28T10:00:00		CH	STS-2	120	HRD-24	120	SED	SED	online	ETH	yes+PQLX
CH	FUSIO	46.4549	8.66316	1.48		Fusio - TI	1999-08-16T10:00:00		CH	STS-2	120	Trident	120	SED	SED	online	ETH	yes+PQLX
CH	GIMEL	46.5336	6.26545	1.094		St. Georges - Gimel - VD	1999-09-06T14:00:00		CH	STS-2	120	HRD-24	120	SED	SED	online	ETH	yes+PQLX
CH	GRIMS	46.5781	8.31886	1.746		Grimsel - Gerstenegg - BE	2011-11-09T00:00:00		CH	STS-2	120	Q330HR	200	SED	SED	online	ETH	yes+PQLX
CH	HASLI	46.7568	8.15117	1.28		Hasliberg - BE	1999-01-19T00:00:00		CH	STS-2	120	HRD-24	120	SED	SED	online	ETH	yes+PQLX
CH	LAUCH	46.4155	7.77166	2.16		Lauchernalp - Loetschental - VS	2010-10-21T00:00:00		CH	Trillium_40	40	Taurus	120	SED	SED	online	ETH	yes+PQLX
CH	LIENZ	47.2946	9.4927	1.72		Kamor - SG	2004-10-28T14:10:00		CH	STS-2	120	Trident	120	SED	SED	online	ETH	yes+PQLX
CH	LKBD2	46.3745	7.64433	2.128		Leukerbad - Rinderhalte - VS	2001-07-05T10:00:00		CH	Trillium_240	240	Centaur	200	SED	SED	online	ETH	yes+PQLX
CH	LLS	46.8468	9.00825	1.86		Linth-Limmern - GL	1978-12-06T00:00:00		CH	STS-2	120	HRD-24	120	SED	SED	online	ETH	yes+PQLX
CH	METMA	47.7122	8.25262	0.671		Mettma - Germany	2013-03-28T15:11:39		CH	Trillium_Compact	120	Taurus	200	SED	SED	online	ETH	yes+PQLX
CH	MMK	46.0505	7.96399	2.21		Mattmark - VS	1981-01-07T00:00:00		CH	STS-2	120	HRD-24	120	SED	SED	online	ETH	yes+PQLX
CH	MTI02	47.3793	7.16525	0.508		Mont Terri - HE Schacht - JU	2014-05-19T00:00:00		CH	STS-2	120	Taurus	120	SED	SED	online	ETH	yes+PQLX
CH	MUGIO	45.9219	9.04167	0.83		Muggio - TI	2001-12-11T00:00:00		CH	STS-2	120	Trident	120	SED	SED	online	ETH	yes+PQLX
CH	MUO	46.9676	8.63706	1.92		Muotathal - SZ	1981-11-24T00:00:00		CH	STS-2	120	HRD-24	120	SED	SED	online	ETH	yes+PQLX
CH	NALPS	46.5951	8.74828	2.296		Val Nalps - GR	2011-11-02T08:05:00		CH	Trillium_Compact	120	Taurus	200	SED	SED	online	ETH	yes+PQLX
CH	OTER1	47.5777	7.60371	0.252		Otterbach - BS	2006-10-11T11:11:00		CH	CMG-3T	360	CMG_DM24	250	SED	SED	online	ETH	yes+PQLX
CH	PANIX	46.8257	9.11171	1.433		Lag da Pigniu - GR	2011-08-05T00:00:00		CH	STS-2	120	Trident	120	SED	SED	online	ETH	yes+PQLX
CH	PLONS	47.0492	9.3807	1.02		Plons - SG	2002-05-22T13:00:00		CH	STS-2	120	HRD-24	120	SED	SED	online	ETH	yes+PQLX
CH	ROMAN	47.5643	9.33601	0.442		Romanshorn - Forsthaus - TG	2015-04-22T13:45:13		CH	Trillium_120BH	120	Centaur	200	SED	SED	online	ETH	yes+PQLX	borehole
CH	ROTHE	47.4761	7.92093	0.681		Rothenfluh - BL	2013-01-25T00:00:00		CH	Trillium_Compact	120	Taurus	200	SED	SED	online	ETH	yes+PQLX
CH	SAIRA	47.3027	7.08645	0.966		Les Sairains Dessus - JU	2011-11-24T00:00:00		CH	Trillium_Compact	120	Taurus	200	SED	SED	online	ETH	yes+PQLX
CH	SENIN	46.3633	7.2993	2.035		Lac de Senin - Sanetsch - VS	2002-02-06T00:00:00		CH	STS-2	120	HRD-24	120	SED	SED	online	ETH	yes+PQLX
CH	SIMPL	46.2396	8.01958	1.93		Simplonpass - VS	2009-10-28T00:00:00		CH	Trillium_40	40	Taurus	120	SED	SED	online	ETH	yes+PQLX
CH	SLE	47.7645	8.49236	0.648		Schleitheim - SH	1980-11-10T00:00:00		CH	STS-2	120	HRD-24	120	SED	SED	online	ETH	yes+PQLX
CH	SULZ	47.5275	8.11153	0.65		Cheisacher - AG	2000-08-29T00:00:00		CH	STS-2	120	Trident	120	SED	SED	online	ETH	yes+PQLX
CH	TORNY	46.7737	6.95862	0.758		Torny - Romont - FR	2000-01-25T00:00:00		CH	STS-2	120	HRD-24	120	SED	SED	online	ETH	yes+PQLX
CH	VANNI	46.2101	7.59678	1.52		Val d'Anniviers - VS	2009-10-30T00:00:00		CH	Trillium_40	40	Taurus	120	SED	SED	online	ETH	yes+PQLX
CH	VDL	46.4832	9.44956	1.927		Valle di Lei - GR	1983-07-06T00:00:00		CH	STS-2	120	HRD-24	200	SED	SED	online	ETH	yes+PQLX
CH	WALHA	47.7528	9.1231	0.419		Wallhausen - Germany	2013-07-29T00:00:00		CH	Trillium_Compact	120	Taurus	200	SED	SED	online	ETH	yes+PQLX
CH	WILA	47.4147	8.90753	0.908		Wila - ZH	2000-01-12T00:00:00		CH	STS-2	120	HRD-24	120	SED	SED	online	ETH	yes+PQLX
CH	WIMIS	46.6649	7.62418	0.77		Wimmis - BE	2000-05-24T00:00:00		CH	STS-2	120	HRD-24	120	SED	SED	online	ETH	yes+PQLX
CH	WOLEN	46.9978	7.3688	0.623		Wohlen bei Bern - Struchismoos - BE	2015-05-27T13:00:00		CH	Trillium_120BH	120	Centaur	200	SED	SED	online	ETH	yes+PQLX	borehole
CH	ZUR	47.3692	8.58088	0.51		Zuerich - Degenried - ZH	1998-04-14T00:00:00		CH	STS-2	120	Trident	200	SED	SED	online	ETH	yes+PQLX
CR	BRJN	44.9057	13.7503	0.026		Brijuni	2009-11-04T00:00:00		HR	STS-2	120	Q330	100	PMF	PMF	online	ORFEUS	no	data for AA only
CR	HVAR	43.1775	16.4489	0.217		Hvar	2006-04-01T00:00:00		HR	STS-2	120	Q330	100	PMF	PMF	online	ORFEUS	no	data for AA only
CR	KALN	46.1312	16.4557	0.58		Kalnik	2010-06-15T00:00:00		HR	CMG-40T	30	CMG_DM24	50	PMF	PMF	online	ORFEUS	no	data for AA only -- records 50sps - 100sps only in triggered mode
CR	KIJV	44.0049	16.4047	0.471		Kijevo	2004-04-06T00:00:00		HR	CMG-40T	30	CMG_DM24	50	PMF	PMF	online	ORFEUS	no	data for AA only -- records 50sps - 100sps only in triggered mode
CR	MORI	43.866	15.7073	0.14		Morici	2011-05-05T00:00:00		HR	CMG-40T	30	CMG_DM24	50	PMF	PMF	online	ORFEUS	no	data for AA only -- records 50sps - 100sps only in triggered mode
CR	MOSL	45.6135	16.7544	0.48		Moslavacka gora	2013-09-04T00:00:00		HR	CMG-40T	30	CMG_DM24	50	PMF	PMF	online	ORFEUS	no	data for AA only -- records 50sps - 100sps only in triggered mode
CR	NVLJ	44.5635	14.8711	0.02		Novalja	2002-03-31T00:00:00		HR	CMG-40T	30	CMG_DM24	50	PMF	PMF	online	ORFEUS	no	data for AA only -- records 50sps - 100sps only in triggered mode
CR	OZLJ	45.6153	15.4673	0.155		Ozalj	2011-01-05T00:00:00		HR	CMG-40T	30	CMG_DM24	50	PMF	PMF	online	ORFEUS	no	data for AA only -- records 50sps - 100sps only in triggered mode
CR	PTJ	45.9073	15.9682	0.994		Puntijarka	2004-06-17T00:00:00		HR	CMG-3ESP	60	CMG_DM24	50	PMF	PMF	online	ORFEUS	no	data for AA only -- records 50sps - 100sps only in triggered mode
CR	RIY	45.3251	14.483	0.183		Rijeka	2002-04-25T00:00:00		HR	CMG-40T	30	CMG_DM24	50	PMF	PMF	online	ORFEUS	no	data for AA only -- records 50sps - 100sps only in triggered mode
CR	STON	42.8716	17.6999	0.004		Ston	2003-10-13T00:00:00		HR	CMG-40T	30	CMG_DM24	50	PMF	PMF	online	ORFEUS	no	records 50sps - 100sps only in triggered mode
CR	UDBI	44.5314	15.7693	0.832		Udbina	2009-05-22T00:00:00		HR	CMG-40T	30	CMG_DM24	50	PMF	PMF	online	ORFEUS	no	data for AA only -- records 50sps - 100sps only in triggered mode
CR	ZAG	45.8271	15.9869	0.179		Zagreb	1999-11-11T00:00:00		HR	CMG-40T	30	CMG_DM24	50	PMF	PMF	online	ORFEUS	no	records 50sps - 100sps only in triggered mode
CZ	CKRC	48.8199	14.3095	0.5		Cesky Krumlov	2013-07-10T00:00:00		CZ	STS-2	120	RUP	100	IRSM Prague	IRSM Prague	online	GFZ	no	sends BH? at 20sps as well
CZ	GOPC	49.914	14.787	0.545		Pecny	2010-04-09T00:00:00		CZ	CMG-3T	120	CMG_DM24	100	RI GTC Zdiby	UK Prague	online	GFZ	no	sends BH? at 20sps as well
CZ	JAVC	48.8591	17.6707	0.827		Velka Javorina	1995-10-27T00:00:00		CZ	STS-2	120	Q380	80	MUNI Brno/ZAMG	MUNI Brno	online	GFZ	no	sends BH? at 20sps as well
CZ	KHC	49.1309	13.5782	0.7		Kasperske Hory	2010-05-07T00:00:00		CZ	STS-2	120	Q330S	100	IG-ASCR	IG-ASCR	online	GFZ	no	sends BH? at 20sps as well
CZ	KRUC	49.0619	16.3952	0.341		Moravsky Krumlov	2012-12-10T00:00:00		CZ	STS-2	120	Q330S	100	MUNI Brno/ZAMG	MUNI Brno	online	GFZ	no	sends BH? at 40sps as well
CZ	LAC	50.0508	12.625	0.838		Lazy	2013-07-10T00:00:00		CZ	STS-2	120	NM	100	IG-ASCR	IG-ASCR	offline	GFZ	no	currently in offline mode - sends BH? at 20sps as well
CZ	MORC	49.7768	17.5425	0.742		Moravsky Beroun	2010-06-08T00:00:00		CZ	STS-2	120	Q330HR	80	MUNI Brno/Geofon	MUNI Brno	online	GFZ	no	also in GE network - sends BH? at 20sps as well
CZ	PBCC	49.6856	13.9953	0.465		Pribram	2013-07-10T00:00:00		CZ	CMG-40T	30	ED+SC	100	IG-ASCR	IG-ASCR	online	GFZ	no	sends BH? at 20sps as well
CZ	PRA	50.0703	14.4331	0.225		Praha	2012-04-02T00:00:00		CZ	CMG-3T	120	CMG_DM24	100	UK Prague	UK Prague	online	GFZ	no	sends BH? at 20sps as well
CZ	PRU	49.9883	14.5417	0.302		Pruhonice	2010-05-26T00:00:00		CZ	STS-2	120	Q330S	100	IG-ASCR	IG-ASCR	online	GFZ	no	sends BH? at 20sps as well
CZ	TREC	49.2948	15.4871	0.559		Tresť	2012-05-23T00:00:00		CZ	CMG-3T	120	Q330S	100	IG-ASCR	IG-ASCR	online	GFZ	no	sends BH? at 20sps as well
CZ	VRAC	49.3084	16.5933	0.475		Vranov	2012-06-04T00:00:00		CZ	STS-2_HG	120	Q330S	100	MUNI Brno/CTBT	MUNI Brno	online	GFZ	no	sends BH? at 40sps as well
FR	AGO	46.0498	3.1317	0.495		Saint-Agoulin - 63	2016-12-13T14:54:00		FR	Trillium_120QA	120	Centaur	100	OPGC	OPGC	online	RESIF	yes+PQLX
FR	AJAC	41.9279	8.763	0.027		Ajaccio - 2A	2013-06-11T15:00:00		FR	CMG-3ESPC	60	Kephren	100	OCA	OCA	online	RESIF	yes+PQLX
FR	ARBF	43.4917	5.3325	0.185		Aix en provence - 13	1998-10-26T00:00:00		FR	STS-2	120	Agecodagis_Titan	125	OCA	OCA	online	RESIF	yes+PQLX
FR	ARTF	43.5882	5.8067	0.51		Artigues - 83	2011-04-28T10:26:00		FR	Trillium_Compact	120	Staneo_D6BB-DIN	125	OCA	OCA	online	RESIF	yes+PQLX	CMG-3ESPC from 2017-02-17T10:30:00
FR	ASEAF	42.7948	6.1635	-2.47		Antares - 83	2010-10-10T00:00:00		FR	CMG-3T	360	CMG_DM24	100	OCA	OCA	online	RESIF	yes+PQLX
FR	BANN	44.3689	4.1563	0.447		Banne - 07	2014-09-25T11:30:00		FR	Trillium_Compact	120	Taurus	100	OSUG	OSUG	online	RESIF	yes+PQLX
FR	BLAF	43.951	6.045	0.59		Entrevennes - 04	2011-11-16T11:00:00		FR	Trillium_40	40	Kephren	100	OCA	OCA	online	RESIF	yes+PQLX
FR	BOUC	47.2469	6.25606	0.458		Bouclans - 25	2016-04-01T13:00:00		FR	STS-2	120	Taurus	100	EOST	EOST	online	RESIF	yes+PQLX
FR	BSTF	43.8009	5.6433	0.5		La Bastides des Jourdans - 84	2010-07-08T10:14:00		FR	CMG-40T	30	Staneo_D6BB-DIN	125	OCA	OCA	online	RESIF	yes+PQLX
FR	CALF	43.7528	6.9218	1.242		Plateau de calern - 06	1995-10-29T10:00:00		FR	STS-2	120	Kephren	100	OCA	OCA	online	RESIF	yes+PQLX
FR	CFF	45.762	3.102	0.4		Clermont Ferrand - 63	2008-09-09T00:00:00		FR	STS-2	120	Q330	100	OPGC	OPGC	online	RESIF	yes+PQLX
FR	CHMF	47.2484	6.6517	0.868		Charmoille - 25	2009-06-29T00:00:00		FR	STS-2	120	Q330HR	100	EOST	EOST	online	RESIF	yes+PQLX
FR	CIEL	48.8326	7.36375	0.388		Vacanciel - 67	2016-09-30T10:00:00		FR	Trillium_Compact	120	Q330S	200	EOST	EOST	online	RESIF	yes+PQLX
FR	CLAF	43.135	3.09	0.115		Gruissan - 11	2016-06-07T14:00:00		FR	CMG-3ESP	120	Taurus	100	OSUG	OMP	online	RESIF	yes+PQLX
FR	COLF	45.5002	3.6939	0.72		Collangettes - 63	2016-12-12T16:43:00		FR	Trillium_120QA	120	Centaur	100	OPGC	OPGC	online	RESIF	yes+PQLX
FR	CORF	42.298	9.153	0.475		Corte - 2B	2014-01-22T08:55:00		FR	CMG-3ESPC	60	Agecodagis_Titan	125	OCA	OCA	online	RESIF	yes+PQLX
FR	EILF	43.5479	7.1312	0.03		Antibes - 06	2012-08-10T13:20:00		FR	CMG-40T	30	Staneo_D6BB-DIN	100	OCA	OCA	online	RESIF	yes+PQLX
FR	ENAUX	44.1095	6.7775	1.35		Villeneuve d'Entraunes - 06	2016-05-09T15:00:00		FR	STS-2	120	Taurus	100	OSUG	OCA	offline	RESIF	yes+PQLX
FR	ESCA	43.831	7.3744	0.55		L'Escarene - 06	2003-10-29T12:30:00		FR	CMG-40T	60	Staneo_D6BB-DIN	100	OCA	OCA	online	RESIF	yes+PQLX
FR	FLAF	43.3827	6.2548	0.062		Flassans sur Issole - 83	2016-01-15T17:00:00		FR	STS-2	120	Taurus	100	OCA	OCA	online	RESIF	yes+PQLX
FR	GRN	45.2413	5.7439	1.1		Grenoble - 38	2013-06-26T12:00:00		FR	Trillium_Compact	120	Taurus	100	OSUG	OSUG	online	RESIF	yes+PQLX
FR	ILLF	47.6834	7.2543	0.298		Illfurth - 68	2017-06-08T12:00:00		FR	Trillium_Compact	120	Q330S	200	EOST	EOST	online	RESIF	yes+PQLX	non-standard orientation
FR	ILLK	48.516	7.71682	0.144	5	Illkirch-Graffenstaden - 67	2016-02-18T10:30:00		FR	Trillium_120PH	120	Q330S	200	EOST	EOST	online	RESIF	yes+PQLX
FR	ISO	44.184	7.05	0.91		Isola - 06	2003-09-17T10:00:00		FR	STS-2	120	Kephren	100	OSUG	OSUG	online	RESIF	yes+PQLX
FR	LBL	45.2313	3.246	0.937		Lubilhac - 43	2016-12-14T11:15:00		FR	Trillium_120QA	120	Centaur	100	OPGC	OPGC	online	RESIF	yes+PQLX
FR	LEMB	49.0339	7.75891	0.284		Lembach - 67	2017-01-18T14:00:00		FR	Trillium_Compact	120	Q330S	20	EOST	EOST	online	RESIF	yes+PQLX
FR	MLYF	43.988	5.7675	0.765		Le clot de Melly - 04	2010-07-13T08:26:00		FR	Trillium_40	40	Kephren	100	OCA	OCA	online	RESIF	yes+PQLX
FR	MOF	47.851	7.134	1.104		Wattwiller - 68	2015-06-03T10:30:00		FR	Trillium_Compact	120	Taurus	100	EOST	EOST	online	RESIF	yes+PQLX
FR	MON	43.7303	7.42469	0.02		Monaco	2006-12-13T10:00:00		MC	CMG-3ESPC	60	Kephren	100	OCA	OCA	online	RESIF	yes+PQLX
FR	MORSI	42.953	9.363	0.1		Morsiglia - 2B	2016-01-27T17:00:00		FR	STS-2	120	Taurus	100	OCA	OCA	online	RESIF	yes+PQLX
FR	MVIF	43.896	7.153	1.48		Tourette du Chateau - 06	2014-05-07T15:20:00		FR	Trillium_Compact	40	Staneo_D6BB-DIN	100	OCA	OCA	online	RESIF	yes+PQLX
FR	OG02	46.1542	6.22021	0.606		Monnetier Mornex - 74	2011-12-22T10:00:00		FR	STS-2	120	Taurus	100	OSUG	OSUG	online	RESIF	yes+PQLX
FR	OG35	46.0448	5.57181	0.9		Corcelles - 01	2010-09-28T12:00:00		FR	Trillium_240	240	Kephren	100	OSUG	OSUG	online	RESIF	yes+PQLX
FR	OGAG	44.7878	6.53974	1.28		L'Argentiere La Bessee - 05	1995-06-09T10:00:00		FR	Trillium_240	240	Kephren	100	OSUG	OSUG	online	RESIF	yes+PQLX
FR	OGCB	44.8501	5.09654	0.738		Combovin - 26	2015-12-04T16:00:00		FR	STS-2	120	Taurus	100	OSUG	OSUG	online	RESIF	yes+PQLX
FR	OGDI	44.1093	6.2253	0.77		Dignes les bains - 04	1995-01-01T10:00:00		FR	Trillium_120	120	Kephren	100	OSUG	OSUG	online	RESIF	yes+PQLX
FR	OGGM	45.2057	6.11674	1.575		Vaujany - 38	1995-01-01T10:00:00		FR	STS-2	120	Kephren	100	OSUG	OSUG	online	RESIF	yes+PQLX
FR	OGMO	45.2049	6.68308	1.2		Modane - 73	1996-10-07T10:00:00		FR	Trillium_Compact	120	Taurus	100	OSUG	OSUG	online	RESIF	yes+PQLX
FR	OGMY	45.881	5.88932	0.656		Moye - 74	2015-12-16T16:00:00		FR	STS-2	120	Taurus	100	OSUG	OSUG	online	RESIF	yes+PQLX
FR	OGRV	46.3459	4.7522	0.293		La Roche-Vineuse - 71	2016-07-21T17:00:00		FR	STS-2	120	Taurus	100	OSUG	OSUG	online	RESIF	yes+PQLX
FR	OGS1	45.0608	5.80464	0.775		Landslide gallery Sechilienne - 38	2012-07-17T18:00:00		FR	Trillium_Compact	120	Taurus	200	OMIV	OSUG	online	RESIF	yes+PQLX
FR	OGS2	45.0648	5.802	1.078		Landslide middle Sechilienne - 38	2012-07-10T18:00:00		FR	Trillium_Compact	120	Taurus	200	OMIV	OSUG	online	RESIF	yes+PQLX
FR	OGS3	45.0695	5.8061	1.1191		Mont-Sec Sechilienne - 38	2013-08-28T09:00:00		FR	Trillium_Compact	120	Taurus	200	OMIV	OSUG	online	RESIF	yes+PQLX
FR	OGSA	45.0369	6.401	2.106		Villard d'Arene - 05	2015-11-23T15:00:00		FR	STS-2	120	Taurus	100	OSUG	OSUG	online	RESIF	yes+PQLX
FR	OGSI	46.0567	6.75611	0.75		sixt fer a cheval - 74	1996-03-06T00:00:00		FR	Trillium_Compact	120	Centaur	100	OSUG	OSUG	online	RESIF	yes+PQLX
FR	OGSM	45.6093	5.69724	0.546		Saint Maurice de Rotherens - 01	2011-11-15T12:00:00		FR	Trillium_120QA	120	Centaur	100	OSUG	OSUG	online	RESIF	yes+PQLX
FR	OGVG	44.8152	6.11233	1.09		Saint Marice en Valgodemard - 38	2015-10-07T12:00:00		FR	Trillium_Compact	120	Centaur	100	OSUG	OSUG	online	RESIF	yes+PQLX
FR	PLDF	45.9646	3.6227	0.885		Col de la Plantade - 63	2016-12-15T11:37:00		FR	Trillium_120QA	120	Centaur	100	OPGC	OPGC	online	RESIF	yes+PQLX
FR	PLYF	46.9572	4.7432	0.347		Puligny-Montrachet - 21	2016-04-01T13:00:00		FR	STS-2	120	Taurus	100	EOST	EOST	online	RESIF	yes+PQLX
FR	PRIMA	43.6442	7.211	-0.017		EMSO-Ligure Nice Observatory - 06	2016-06-26T08:10:00		FR	CMG-3T	360	?	100	OCA	OCA	online	RESIF	yes+PQLX
FR	RIVEL	46.759	5.92249	0.871		Mont Rivel - Equevillon - 39	2016-01-08T10:00:00		FR	STS-2	120	Taurus	100	EOST	EOST	online	RESIF	yes+PQLX
FR	RONF	47.7107	6.6472	0.415		Ronchamp - 70	2015-12-03T13:00:00		FR	STS-2	120	Taurus	100	EOST	EOST	online	RESIF	yes+PQLX
FR	RSL	45.6882	6.62452	1.59		Roselend - 73	2010-05-28T00:00:00		FR	Trillium_120	120	Kephren	100	OSUG	OSUG	online	RESIF	yes+PQLX
FR	RUSF	43.9412	5.4837	0.4992		Rustrel - 84	2000-08-02T13:24:00		FR	STS-2	120	Kephren	125	OCA	OCA	online	RESIF	yes+PQLX	7-station array
FR	SAOF	43.986	7.5532	0.595		Saorge - 06	1994-04-27T10:00:00		FR	STS-2	120	Kephren	100	OCA	OCA	online	RESIF	yes+PQLX
FR	SAUF	43.9377	5.1064	0.23		Saumane de Vaucluse - 84	2015-05-13T14:30:00		FR	CMG-3ESPC	60	Staneo_D6BB-DIN	100	OCA	OCA	online	RESIF	yes+PQLX
FR	SJAF	42.4845	2.8822	0.45		Saint Jean l'Albere - 66	2007-02-01T10:17:00		FR	STS-2	120	Kephren	100	OMP	OMP	online	RESIF	yes+PQLX
FR	SMPL	42.0945	9.2847	0.405		Ghisoni - 2B	1996-10-22T11:30:00		FR	STS-2	120	Kephren	100	OCA	OCA	online	RESIF	yes+PQLX
FR	SPIF	44.0558	7.2366	1.38		Venanson - 06	2015-10-01T13:00:00		FR	CMG-3T	120	Staneo_D6BB-DIN	100	OCA	OCA	online	RESIF	yes+PQLX
FR	STR	48.5799	7.7633	0.135		Strasbourg - 67	2015-06-05T00:00:00		FR	STS-2	120	Q330HR	100	EOST	EOST	online	RESIF	yes+PQLX
FR	SURF	44.4809	6.8117	1.82		Meyronnes - 04	2010-03-13T10:00:00		FR	Trillium_120	120	Kephren	100	OSUG	OSUG	online	RESIF	yes+PQLX
FR	SZBH	48.9325	7.86304	0.144		Soultz borehole - 67	2016-10-06T12:00:00		FR	CMG-3T	360	CMG_DM24	200	EOST	EOST	online	RESIF	yes+PQLX
FR	TRBF	44.1054	3.9587	0.12		Mialet - 30	2010-12-06T09:50:00		FR	STS-2	120	Q330HR	100	OREME	OREME	online	RESIF	yes+PQLX
FR	TRIGF	43.7471	6.4074	1.01		Trigance - 83	2016-04-05T13:30:00		FR	STS-2	120	Taurus	100	OCA	OCA	online	RESIF	yes+PQLX
FR	TURF	43.9749	7.3919	1.65		Moulinet - 06	2013-08-23T14:23:00		FR	Trillium_240	240	Kephren	100	OCA	OCA	online	RESIF	yes+PQLX
FR	WALT	47.9657	7.27652	0.373		Westhalten - 68	2017-06-08T15:00:00		FR	Trillium_Compact	120	Q330S	200	EOST	EOST	online	RESIF	yes+PQLX	non-standard orientation
FR	WLS	48.4127	7.3536	0.833		Welshbrusch - 67	2011-10-04T18:00:00		FR	Trillium_40	40	Q330	100	EOST	EOST	online	RESIF	yes+PQLX
G	ECH	48.2163	7.1589	0.58		Sainte Marie aux Mines - 68	2002-05-15T00:00:00		FR	STS-1	78	Q330HR	20	EOST	EOST	online	RESIF	yes+PQLX
G	SSB	45.279	4.542	0.7		Saint sauveur en Rue - 42	1982-05-02T00:00:00		FR	STS-1	999	Q330HR	100	IPGP	IPGP	online	RESIF	yes+PQLX	lower corner period not (yet) provided
G	SSB	45.279	4.542	0.7		Saint sauveur en Rue - 42	1982-05-02T00:00:00		FR	STS-2	120	Q330HR	100	IPGP	IPGP	online	RESIF	yes+PQLX	check also IPGP node?
GE	STU	48.7719	9.195	0.36	10		2015-09-03T14:55:00		DE	STS-2	120	Q4120M	100	GEOFON	GEOFON	online	GFZ	?	Station existed since 2000-01-01T00:00:00 but with different configuration
GR	BFO	48.3311	8.3303	0.589			2011-10-19T00:00:00		DE	STS-2	120	Q330HR	100	BGR	BGR	online	BGR	?	Station existed since 1991-01-01T00:00:00 but with different configuration
GR	FUR	48.1639	11.2768	0.565			2006-12-21T00:00:00		DE	STS-2	120	Reftek_130	100	BGR	BGR	online	BGR	?	Station existed since 1991-03-01T00:00:00 but with different configuration
GR	GEC2	48.8443	13.7006	1.15			1997-01-01T00:00:00		DE	STS-2	120	HRD-24	80	BGR	BGR	online	BGR	?
GR	GRA1	49.6919	11.2217	0.5			2007-09-19T00:00:00		DE	STS-2	120	Reftek_130	100	BGR	BGR	online	BGR	?
GR	GRA2	49.6552	11.3594	0.512			2007-08-30T00:00:00		DE	STS-2	120	Reftek_130	100	BGR	BGR	online	BGR	?
GR	GRA3	49.7622	11.3187	0.455			2007-12-19T00:00:00		DE	STS-2	120	Reftek_130	100	BGR	BGR	online	BGR	?
GR	GRA4	49.5654	11.4359	0.503			2010-04-26T00:00:00		DE	STS-2	120	Reftek_130	100	BGR	BGR	online	BGR	?
GR	GRB1	49.3913	11.652	0.494			2007-12-21T00:00:00		DE	STS-2	120	Reftek_130	100	BGR	BGR	online	BGR	?
GR	GRB2	49.2709	11.67	0.552			2008-01-10T00:00:00		DE	STS-2	120	Reftek_130	100	BGR	BGR	online	BGR	?
GR	GRB3	49.3435	11.806	0.517			2010-04-27T00:00:00		DE	STS-2	120	Reftek_130	100	BGR	BGR	online	BGR	?	Station existed since 2006-10-19T00:00:00 but with different configuration
GR	GRB4	49.4689	11.5608	0.507			2008-07-07T00:00:00		DE	STS-2	120	Reftek_130	100	BGR	BGR	online	BGR	?
GR	GRB5	49.1121	11.6767	0.525			2010-04-28T00:00:00		DE	STS-2	120	Reftek_130	100	BGR	BGR	online	BGR	?
GR	GRC1	48.9962	11.5213	0.512			2009-04-22T00:00:00		DE	STS-2	120	Reftek_130	100	BGR	BGR	online	BGR	?
GR	GRC2	48.8676	11.3755	0.445			2009-07-29T00:00:00		DE	STS-2	120	Reftek_130	100	BGR	BGR	online	BGR	?
GR	GRC3	48.8902	11.5858	0.438			2009-10-05T00:00:00		DE	STS-2	120	Reftek_130	100	BGR	BGR	online	BGR	?
GR	GRC4	49.0867	11.5263	0.503			2010-04-28T00:00:00		DE	STS-2	120	Reftek_130	100	BGR	BGR	online	BGR	?
GR	MILB	49.8284	9.2923	0.369			2015-03-17T00:00:00		DE	STS-2	120	Reftek_130	100	BGR	BGR	online	BGR	?
GR	TMO22	49.2192	8.1848	0.134			2013-09-10T19:15:00		DE	STS-2	120	Q330	100	BGR	BGR	online	BGR	?	This altitude is correct and not 277m
GR	UBR	47.6799	10.1071	0.903			2015-09-16T13:00:00		DE	STS-2	120	Reftek_130	100	BGR	BGR	online	BGR	?	Station existed since 2008-11-25T00:00:00 but with different configuration
GR	WET	49.1448	12.8803	0.613			2007-03-29T00:00:00		DE	STS-2	120	Reftek_130	100	BGR	BGR	online	BGR	?	Station existed since 1991-06-01T00:00:00 but with different configuration
GU	BHB	44.8352	7.26333	0.585		Bricherasio (TO)	2006-10-01T00:00:00		IT	Trillium_40	40	Taurus	100	Uni Genoa RSNI	Uni Genoa RSNI	online	INGV	yes+PQLX	Station existed since 1990 but with different configuration
GU	BURY	43.7825	7.5569	0.02		Villa Hambury - Ventimiglia (IM)	2015-04-01T00:00:00		IT	Trillium_40	40	Taurus	100	Uni Genoa RSNI	Uni Genoa RSNI	online	INGV	yes+PQLX
GU	CANO	44.2075	8.2372	0.638		Canova - Finale Ligure (IM)	2015-09-01T00:00:00		IT	Trillium_40	40	Taurus	100	Uni Genoa RSNI	Uni Genoa RSNI	online	INGV	yes+PQLX
GU	CARD	44.0261	10.4821	0.38		Gallicano - Cardoso (LU)	2013-03-01T00:00:00		IT	Trillium_40	40	Taurus	100	Uni Genoa RSNI	Uni Genoa RSNI	online	INGV	yes+PQLX	Station existed since 1996-03 but with different configuration
GU	CIRO	45.6019	7.5682	2.516		Cimetta Rossa - Champorcher (AO)	2009-11-01T00:00:00		IT	Trillium_40	40	Taurus	100	Uni Genoa RSNI	Uni Genoa RSNI	online	INGV	yes+PQLX
GU	ENR	44.2267	7.42033	1.16		Entracque (CN)	2011-05-01T00:00:00		IT	Trillium_40	40	Taurus	100	Uni Genoa RSNI	Uni Genoa RSNI	online	INGV	yes+PQLX	Station existed since 1989 but with different configuration
GU	EQUI	44.166	10.153	0.35		Equi Terme (MS)	2012-05-01T00:00:00		IT	CMG-40	40	Taurus	100	Uni Genoa RSNI	Uni Genoa RSNI	online	INGV	yes+PQLX
GU	GBOS	44.2416	7.8399	0.897		Grotte di Bossea (CN)	2011-10-01T00:00:00		IT	Trillium_240	240	Taurus+Trident	100	Uni Genoa RSNI	Uni Genoa RSNI	online	INGV	yes+PQLX
GU	GORR	44.6071	9.2926	0.609		Gorreto (GE)	2012-03-01T00:00:00		IT	Trillium_40	40	Taurus	100	Uni Genoa RSNI	Uni Genoa RSNI	online	INGV	yes+PQLX
GU	GRAM	44.4913	10.0658	0.85		Graiana (PR)	2012-12-01T00:00:00		IT	CMG-40	40	Taurus	100	Uni Genoa RSNI	Uni Genoa RSNI	online	INGV	yes+PQLX	Station existed since 1999 but with different configuration
GU	GSCL	44.3506	10.588	0.674		Gusciola (MO)	2016-01-20T00:00:00		IT	Trillium_240	240	Taurus	100	INGV	Uni Genoa RSNI	online	INGV	yes+PQLX
GU	LSD	45.4595	7.13433	2.285		Lago del Serrù (TO)	2007-07-01T00:00:00		IT	Trillium_40	40	Trident	100	Uni Genoa RSNI	Uni Genoa RSNI	online	INGV	yes+PQLX	Station existed since 1985 but with different configuration
GU	MAIM	43.9142	10.4915	0.2		Mastiano (LU)	2006-04-01T00:00:00		IT	Trillium_40	40	Trident	100	Uni Genoa RSNI	Uni Genoa RSNI	online	INGV	yes+PQLX	Station existed since 2000 but with different configuration
GU	MGRO	44.0424	7.8081	1.689		Montegrosso – Pianlatte (IM)	2012-10-01T00:00:00		IT	Trillium_40	40	Trident	100	Uni Genoa RSNI	Uni Genoa RSNI	online	INGV	yes+PQLX
GU	PCP	44.5413	8.54517	0.77		Piancastagna (AL)	2006-04-01T00:00:00		IT	Trillium_40	40	Taurus	100	Uni Genoa RSNI	Uni Genoa RSNI	online	INGV	yes+PQLX	Station existed since 1989 but with different configuration
GU	POPM	44.0045	10.757	0.44		Popiglio (PT)	2010-11-01T00:00:00		IT	CMG-40	40	Taurus	100	Uni Genoa RSNI	Uni Genoa RSNI	online	INGV	yes+PQLX	Station existed since 2004 but with different configuration
GU	PZZ	44.5068	7.116	1.43		Stroppo (CN)	2007-04-01T00:00:00		IT	Trillium_40	40	Taurus	100	Uni Genoa RSNI	Uni Genoa RSNI	online	INGV	yes+PQLX	Station existed since 1985 but with different configuration
GU	REMY	45.8378	7.1565	2.448		Saint Rhemy en Bosses (AO)	2011-10-01T00:00:00		IT	Trillium_40	40	Centaur	100	Uni Genoa RSNI	Uni Genoa RSNI	online	INGV	yes+PQLX
GU	RNCA	44.4712	8.9512	0.235		Ronca - Sant'Olcese (GE)	2015-06-01T00:00:00		IT	CMG-40	40	Taurus	100	Uni Genoa RSNI	Uni Genoa RSNI	online	INGV	yes+PQLX
GU	RORO	44.1122	8.06617	0.26		Roccarossa - Castelbianco (SV)	2007-08-01T00:00:00		IT	CMG-3	40	Taurus	100	Uni Genoa RSNI	Uni Genoa RSNI	online	INGV	yes+PQLX	Station existed since 1998 but with different configuration
GU	ROTM	44.8493	8.3527	0.221		Rocchetta Tanaro (AT)	2011-02-01T00:00:00		IT	Trillium_40	40	Taurus	100	Uni Genoa RSNI	Uni Genoa RSNI	online	INGV	yes+PQLX	Station existed since 2001-07 but with different configuration
GU	RRL	44.9208	6.79083	2.13		Rocca Remolon (TO)	2010-02-01T00:00:00		IT	Trillium_40	40	Taurus	100	Uni Genoa RSNI	Uni Genoa RSNI	online	INGV	yes+PQLX	Station existed since 1985 but with different configuration
GU	RSP	45.1482	7.26533	1.285		Reno Superiore (TO)	2006-05-01T00:00:00		IT	Trillium_40	40	Trident	100	Uni Genoa RSNI	Uni Genoa RSNI	online	INGV	yes+PQLX	Station existed since 1985 but with different configuration
GU	SARM	44.184	10.401	1.065		Sassorosso (LU)	2011-02-01T00:00:00		IT	Trillium_40	40	Taurus	100	Uni Genoa RSNI	Uni Genoa RSNI	online	INGV	yes+PQLX	currently running only EH? channels (Lennartz LE3D-5s). Station existed since 1992 but with different configuration
GU	SATI	45.8753	7.8685	3.005		Passo dei Salati (AO)	2009-11-01T00:00:00		IT	Trillium_40	40	Centaur	100	Uni Genoa RSNI	Uni Genoa RSNI	online	INGV	yes+PQLX
GU	STV	44.2455	7.326	0.93		Sant'Anna di Valdieri (CN)	2006-11-01T00:00:00		IT	Trillium_240	240	Taurus	100	Uni Genoa RSNI	Uni Genoa RSNI	online	INGV	yes+PQLX	Station existed since 1985 but with different configuration and name (STV2; STVA)
GU	TRAV	45.5127	7.747	0.99		Traversella (TO)	2007-04-01T00:00:00		IT	Trillium_40	40	Taurus	100	Uni Genoa RSNI	Uni Genoa RSNI	online	INGV	yes+PQLX	Station existed since 1997 but with different configuration
HU	BEHE	46.4706	16.7757	0.289		Becsehely - Hungary	2005-07-03T00:00:00		HU	STS-2	120	PS6-24	100	MTA CSFK GGI	KRSZO	online	GFZ	?
HU	BUD	47.4831	19.0201	0.195		Budapest - Hungary	2004-11-07T00:00:00		HU	STS-2	120	PS6-24	100	MTA CSFK GGI	KRSZO	online	GFZ	?
HU	CSKK	47.3631	18.2605	0.319		Csokako - Hungary	2009-03-07T00:00:00		HU	CMG-3T	120	CMG_DM24_S3EAM	100	MTA CSFK GGI	KRSZO	online	GFZ	?
HU	EGYH	47.4163	17.3319	0.129		Egyhazaskeszo - Hungary	2014-07-24T00:00:00		HU	CMG-3T	120	CMG_DM24_S3EAM	100	MTA CSFK GGI	KRSZO	online	GFZ	?
HU	KOVH	46.0883	18.0999	0.27		Kovagotottos - Hungary	2015-02-24T00:00:00		HU	STS-2.5	120	PS6-24	100	MTA CSFK GGI	KRSZO	online	GFZ	?
HU	MPLH	47.1712	17.5348	0.337		Magyarpolany - Hungary	2013-10-08T00:00:00		HU	STS-2.5	120	PS6-24	100	MTA CSFK GGI	KRSZO	online	GFZ	?
HU	SOP	47.6807	16.5567	0.26		Sopron - Hungary	2004-04-14T00:00:00		HU	STS-2	120	PS6-24	100	MTA CSFK GGI	KRSZO	online	GFZ	?
HU	TIH	46.9001	17.8878	0.189		Tihany - Hungary	2012-12-04T00:00:00		HU	CMG-3T	120	CMG_DM24_S3EAM	100	MTA CSFK GGI	KRSZO	online	GFZ	?
IU	GRFO	49.6919	11.2217	0.4			1999-02-05T00:00:00		DE	Trillium_120BH	120	Q330S	80	GSN	BGR	online	ORFEUS	?	altitude has been checked - EIDA altitude is 425m-100m deep=325m - EIDA sensor is KS-36000-I --- Station existed since 1994-01-26T00:00:00 but with different configuration
IV	APEC	43.5585	12.4199	0.488		Apecchio	2014-02-06T00:00:00		IT	Trillium_40	40	GAIA_2	100	INGV	INGV	online	INGV	SQLX
IV	ASQU	43.7967	11.7893	0.86		Asqua	2007-10-25T00:00:00		IT	Trillium_120	120	Trident	100	INGV	INGV	online	INGV	SQLX
IV	BDI	44.0624	10.597	0.83		Bagni di Lucca	2003-03-01T00:00:00		IT	Trillium_40	40	Trident	100	INGV	INGV	online	INGV	SQLX
IV	BOB	44.7679	9.44782	0.91		Bobbo	2003-03-01T00:00:00		IT	Trillium_40	40	Trident	100	INGV	INGV	online	INGV	SQLX
IV	BRIS	44.2245	11.7666	0.26		Brisighella	2010-05-26T00:00:00		IT	Trillium_40	40	GAIA_2	100	INGV	INGV	online	INGV	SQLX
IV	BRMO	46.476	10.3731	1.38		Bormio	2003-03-01T00:00:00		IT	Trillium_40	40	GAIA_1	100	INGV	INGV	online	INGV	SQLX	check orientation!
IV	CAVE	44.8658	11.0031	0.18		Cave	2012-11-28T00:00:00		IT	Trillium_120	120	GAIA_2	100	INGV	INGV	online	INGV	SQLX	check installation noisy at low frequency
IV	CELB	42.7466	10.2106	0.742		S.Piero in Campo Elba	2011-06-08T00:00:00		IT	Trillium_40	40	GAIA_2	100	INGV	INGV	online	INGV	SQLX
IV	CRE	43.6189	11.9517	1.215		Caprese Michelangelo	2003-03-01T00:00:00		IT	Trillium_40	40	GAIA_2	100	INGV	INGV	online	INGV	SQLX
IV	CRMI	43.79	10.97	0.49		Carmignano	2006-10-12T00:00:00		IT	Trillium_40	40	Trident	100	INGV	INGV	online	INGV	SQLX
IV	CSNT	43.4731	11.2902	0.636		Castelline in Chianti	2003-03-01T00:00:00		IT	Trillium_40	40	GAIA_2	100	INGV	INGV	online	INGV	SQLX
IV	CTI	46.0482	11.6497	1.18		Castello Tesino	2003-03-01T00:00:00		IT	Trillium_120	120	GAIA_2	100	INGV	INGV	online	INGV	SQLX
IV	FIR	43.7744	11.2551	0.04		Firenze	2009-10-14T00:00:00		IT	Trillium_240	240	GAIA_2	100	INGV	INGV	online	INGV	SQLX	check installation noisy at low frequency
IV	FNVD	44.1678	11.1229	0.95		Fontana Vidola	2003-10-27T00:00:00		IT	Trillium_40	40	Trident	100	INGV	INGV	online	INGV	SQLX
IV	FSSB	43.6931	12.7771	0.523		Fossombrone	2003-03-01T00:00:00		IT	Trillium_40	40	GAIA_1	100	INGV	INGV	online	INGV	SQLX
IV	FVI	46.5966	12.7804	1.024		Forni Avoltri	2003-03-01T00:00:00		IT	CMG-40T	40	GAIA_1	100	INGV	INGV	online	INGV	SQLX	check installation noisy at 80s frequency
IV	GROG	43.4262	9.89201	0.118		Isola di Gorgona	2005-06-23T00:00:00		IT	Trillium_40	40	Trident	100	INGV	INGV	online	INGV	SQLX
IV	IMI	43.9105	7.8932	0.84		Monte Faudo - Imperia (IM)	2007-04-01T00:00:00		IT	Trillium_40	40	Taurus	100	Uni Genoa RSNI	Uni Genoa RSNI	online	INGV	yes+PQLX	Station existed since 1983 but with different configuration
IV	LMD	44.0775	11.7073	0.45			2013-10-21T00:00:00		IT	Trillium_240	240	GAIA_2	100	INGV	INGV	online	INGV	SQLX
IV	MABI	46.0549	10.514	1.853		Malga Bissina	2003-12-19T00:00:00		IT	Trillium_40	40	Trident	100	INGV	INGV	online	INGV	SQLX
IV	MAGA	45.7753	10.6286	1.265		Magasa	2006-06-21T00:00:00		IT	Trillium_40	40	GAIA_1	100	INGV	INGV	online	INGV	SQLX
IV	MAGO	43.2732	10.6579	0.28		Magona	2017-01-11T07:20:21		IT	Trillium_40	40	GAIA_2	100	INGV	INGV	online	INGV	SQLX
IV	MDI	45.7697	9.716	0.954		Monte di Nese	2004-12-03T00:00:00		IT	Trillium_40	40	GAIA_2	100	INGV	INGV	online	INGV	SQLX
IV	MILN	45.4803	9.2321	0.125		Milano	2012-01-27T00:00:00		IT	Trillium_40	40	GAIA_2	100	INGV	INGV	online	INGV	SQLX
IV	MONC	45.0739	7.9271	0.48		Moncucco Torinese	2005-01-13T00:00:00		IT	Trillium_40	40	Trident	100	INGV + Uni Genoa	INGV + Uni Genoa	online	INGV	SQLX
IV	MRGE	45.7698	7.06101	1.66		Morge	2005-06-24T00:00:00		IT	Trillium_40	40	Trident	100	INGV	INGV + Uni Genoa	online	INGV	SQLX
IV	MSSA	44.3162	9.51739	0.93		Maissana	2008-11-21T00:00:00		IT	Trillium_240	240	Trident	100	INGV + Uni Genoa	INGV + Uni Genoa	online	INGV	SQLX	check installation noisy at low frequency horizontals
IV	MTRZ	44.3128	11.4248	0.57		Monterenzio	2007-12-12T00:00:00		IT	Trillium_40	40	Trident	100	INGV	INGV	online	INGV	SQLX
IV	NARO	43.6108	12.5806	0.272		Abbazia di Naro	2011-01-17T00:00:00		IT	Trillium_40	40	GAIA_2	100	INGV	INGV	online	INGV	SQLX	noisy
IV	NDIM	44.8873	10.8987	0.019			2016-12-29T12:00:00		IT	Trillium_40	40	GAIA_2	100	INGV	INGV	online	INGV	SQLX
IV	OPPE	45.3082	11.1724	0.02		Oppeano	2009-09-24T00:00:00		IT	Trillium_40	40	GAIA_2	100	INGV	INGV	online	INGV	SQLX
IV	ORZI	45.4056	9.9307	0.083		Orzinuovi	2010-03-15T00:00:00		IT	Trillium_40	40	Reftek_130	100	INGV	INGV	online	INGV	SQLX
IV	OSSC	43.5236	11.2458	0.452			2011-07-14T00:00:00		IT	Trillium_120	120	GAIA_2	100	INGV	INGV	online	INGV	SQLX
IV	PARC	43.6486	12.2386	0.58		Parchiule	2008-04-01T00:00:00		IT	Trillium_40	40	GAIA_2	100	INGV	INGV	online	INGV	SQLX
IV	PESA	43.941	12.8402	0.221		Pesaro	2003-03-01T00:00:00		IT	Trillium_40	40	GAIA_2	100	INGV	INGV	online	INGV	SQLX	noisy
IV	PII	43.7219	10.525	0.066		Pisa	2003-03-01T00:00:00		IT	Trillium_120	120	GAIA_2	100	INGV	INGV	online	INGV	SQLX
IV	PLMA	44.0498	9.85365	0.022		Palmaria-Portovenere	2010-03-30T00:00:00		IT	Trillium_240	240	Taurus	100	INGV	Uni Genoa RSNI	online	INGV	SQLX	check installation noisy at low frequency
IV	PRMA	44.7637	10.3131	0.078		Parma	2008-06-04T00:00:00		IT	Trillium_120	120	GAIA_2	100	INGV	INGV	online	INGV	SQLX	check installation noisy at low frequency
IV	PTCC	46.4075	13.354	0.7		Patocco	2003-03-01T00:00:00		IT	Trillium_40	40	GAIA_2	100	INGV	INGV	online	INGV	SQLX
IV	QLNO	44.3242	8.34592	0.547		Quiliano	2003-03-01T00:00:00		IT	Trillium_40	40	Taurus	100	INGV	INGV + Uni Genoa	online	INGV	SQLX
IV	ROVR	45.6468	11.0721	1.316		Rovere Veronese	2008-10-08T00:00:00		IT	Trillium_120	120	Trident	100	INGV + Uni Genoa	INGV	online	INGV	SQLX
IV	RSM2	43.9377	12.4451	0.645		Repubblica San Marino	2012-01-18T00:00:00		IT	Trillium_120	120	GAIA_2	100	INGV	INGV	online	INGV	SQLX
IV	SALO	45.6183	10.5243	0.6		Salo	2005-06-24T00:00:00		IT	Trillium_120	120	Trident	100	INGV	INGV	online	INGV	SQLX
IV	SARZ	44.8673	8.9136	0.266		Sarezzano	2015-12-11T00:00:00		IT	Trillium_40	40	GAIA_2	100	INGV	INGV	online	INGV	SQLX
IV	SEI	44.0543	11.3585	0.61		Sant Agata	2003-03-01T00:00:00		IT	Trillium_40	40	GAIA_2	100	INGV	INGV	online	INGV	SQLX	check installation noisy at low frequency
IV	STAL	46.2601	12.7104	0.625		Staligial	2010-05-25T00:00:00		IT	Trillium_120	120	GAIA_2	100	INGV	INGV	online	INGV	SQLX
IV	TEOL	45.3617	11.6739	0.37		Teolo	2009-05-20T00:00:00		IT	Trillium_120	120	GAIA_2	100	INGV	INGV	online	INGV	SQLX	check installation noisy at low frequency; also listed by OGS
IV	VARE	45.8677	8.77	1.219		Varese	2009-10-07T00:00:00		IT	Trillium_40	40	GAIA_2	100	INGV	INGV	online	INGV	SQLX	too low at low freq- picks at high freq!!
IV	ZCCA	44.3509	10.9765	0.7		Zocca	2003-03-01T00:00:00		IT	Trillium_40	40	GAIA_2	100	INGV	INGV	online	INGV	SQLX
IV	ZONE	45.7636	10.1171	0.691			2015-12-01T00:00:00		IT	Trillium_40	40	GAIA_2	100	INGV	INGV	online	INGV	SQLX	check installation noisy at low frequency picks at high
MN	BLY	44.7488	17.1754	0.256		Banja Luka - Bosnia and Herzegovina	2009-05-21T00:00:00		BH	STS-2	120	Q730	100	INGV	RHMZ	online	INGV	SQLX
MN	BNI	45.052	6.678	1.395		Bardonecchia - Italy	1988-04-30T00:00:00		IT	STS-2	120	Q4120	100	INGV	INGV	online	INGV	SQLX
MN	TRI	45.709	13.7642	0.161	120	Trieste - Italy	1996-05-15T00:00:00		IT	STS-1	360	Q4120	100	Uni Trieste + OGS	Uni Trieste + OGS	online	INGV	SQLX	INGV reports 20sps
MN	TUE	46.4722	9.34732	1.924		Stuetta - Italy	2001-11-14T00:00:00		IT	STS-2	120	Q4120	100	INGV	INGV	online	INGV	SQLX
MN	VLC	44.1594	10.3864	0.555		Villacollemandina - Italy	2001-01-01T00:00:00		IT	STS-2	120	Q4120	100	INGV	INGV	online	INGV	SQLX
NI	DST2	45.6589	13.8013	0.08		Trieste (DMG)	2000-05-29T00:00:00		IT	STS-2	120	Q330	100	Uni Trieste	Uni Trieste	online	INGV	no
NI	PALA	46.2453	12.9235	1.28		Monte Pala	2007-01-01T00:00:00		IT	STS-2	120	Q330	100	Uni Trieste	Uni Trieste	online	INGV	no
NI	POLC	46.0266	12.5005	0.15		Polcenigo	2007-01-01T00:00:00		IT	CMG-40T	30	Q330	100	Uni Trieste	Uni Trieste	online	INGV	no
NI	PURA	46.4258	12.7419	1.42		Passo Pura	2007-01-01T00:00:00		IT	STS-2	120	Q330	100	Uni Trieste	Uni Trieste	online	INGV	no
NI	VINO	46.256	13.281	0.608	80	Villanova delle Grotte	2002-01-01T00:00:00		IT	CMG-40T	30	Q4120	100	Uni Trieste + OGS	Uni Trieste + OGS	online	INGV	no	different sensors existed at this site
OE	ABTA	46.7474	12.5123	1.041		Abfaltersbach / Pustertal - Tirol	2006-10-17T17:04:00		AT	STS-2	120	Q330	100	ZAMG	ZAMG	online	ORFEUS	no
OE	ARSA	47.2505	15.5232	0.577		Arzberg - Steiermark	2000-06-16T00:00:00		AT	STS-2	120	Q680	80	ZAMG	ZAMG	online	ORFEUS	no	plan to change sps in 2017
OE	BIOA	47.6913	13.6383	0.61405		Bad Ischl / Oberoesterreich	2016-03-02T11:00:00		AT	STS-2.5	120	Q330	100	ZAMG	ZAMG	online	ORFEUS	no
OE	CONA	47.9282	15.8618	1.046		Conrad Observatorium - Muggendorf - Lower Austria	2007-01-01T00:00:00		AT	STS-2	120	Q330	100	ZAMG	ZAMG	online	ORFEUS	no
OE	CSNA	47.9283	15.8588	1.039		Conrad Observatorium - Muggendorf - Lower Austria	2006-05-18T11:19:16		AT	STS-2	120	Q330	100	ZAMG	ZAMG	online	ORFEUS	no
OE	DAVA	47.2867	9.8803	1.602		Damuels - Vorarlberg - Austria	1999-06-25T00:00:00		AT	STS-2	120	Q380	80	ZAMG	ZAMG	online	ORFEUS	no	plan to change sps in 2017
OE	FETA	47.0211	10.7291	1.632		Feichten / Kaunertal - Tirol	2006-10-11T13:22:54		AT	STS-2	120	Q330	100	ZAMG	ZAMG	online	ORFEUS	no
OE	KBA	47.0784	13.3447	1.721		Koelnbreinsperre - Kaernten	1997-11-24T00:00:00		AT	STS-2	120	Q330	100	ZAMG	ZAMG	online	ORFEUS	no
OE	LESA	47.4243	12.677	1.02953		Schwarzleotal - Leogang / Salzburg	2017-07-10T09:00:00		AT	STS-2.5	120	Q330	100	ZAMG	ZAMG	online	ORFEUS	no
OE	MOA	47.8495	14.2659	0.572		Molln - Upper Austria	1996-01-01T00:00:00		AT	STS-2	120	Q330	100	ZAMG	ZAMG	online	ORFEUS	no
OE	MOTA	47.3448	11.1037	1.575		Moosalm - Tirol	1991-02-09T00:00:00		AT	STS-2.5	120	Q330	100	ZAMG	ZAMG	online	ORFEUS	no
OE	MYKA	46.6299	13.6416	0.909		Terra Mystika / Bad Bleiberg - Kaernten	2006-10-19T13:09:52		AT	STS-2	120	Q330	100	ZAMG	ZAMG	online	ORFEUS	no
OE	OBKA	46.5092	14.5489	1.075		Hochobir - Kaernten	1998-12-04T00:00:00		AT	STS-2	120	Q680	80	ZAMG	ZAMG	online	ORFEUS	no	plan to change sps in 2017
OE	RETA	47.4871	10.7623	0.965		Reutte/Plansee - Tirol	2006-10-12T07:39:49		AT	STS-2	120	Q330	100	ZAMG	ZAMG	online	ORFEUS	no
OE	RONA	47.6997	16.2963	0.69913		Rosalia / Lower Austria	2016-02-19T11:00:00		AT	STS-2.5	120	Q330	100	ZAMG	ZAMG	online	ORFEUS	no
OE	SOKA	46.678	15.0327	1.009		Soboth - Kaernten	2006-05-18T11:19:16		AT	STS-2	120	Q330	100	ZAMG	ZAMG	online	ORFEUS	no
OE	SQTA	47.2205	11.2087	1.307		Sankt Quirin - Tirol	1989-05-01T00:00:00		AT	STS-2.5	120	Q330	100	ZAMG	ZAMG	online	ORFEUS	no	longitude in this table corrected 2017.04.26.
OE	VIE	48.2483	16.3617	0.198		Vienna	2006-10-19T13:09:52		AT	STS-2	120	Q330	100	ZAMG	ZAMG	online	ORFEUS	no
OE	WATA	47.3357	11.5763	1.492		Walderalm - Tirol	1989-10-01T00:00:00		AT	STS-2.5	120	Q330	100	ZAMG	ZAMG	online	ORFEUS	no
OE	WTTA	47.2638	11.6363	1.764		Wattenberg - Tirol	1996-01-01T00:00:00		AT	STS-2.5	120	Q330	100	ZAMG	ZAMG	online	ORFEUS	no
OX	ACOM	46.5488	13.5149	1.715		Acomizza	2003-09-26T00:00:00		IT	STS-2	120	Q330	100	OGS	OGS	online	INGV	yes+PQLX
OX	AGOR	46.2829	12.0472	0.631		Agordo	2007-01-06T00:00:00		IT	STS-2	120	Q680	100	OGS	OGS	online	INGV	yes+PQLX
OX	BAD	46.234	13.2438	0.59		Bernadia	2015-04-28T00:00:00		IT	Trillium_120	120	Q330	100	OGS	OGS	online	INGV	yes+PQLX
OX	BALD	45.683	10.8187	1.981		Monte Baldo	2007-08-11T00:00:00		IT	Trillium_40	40	Q330	100	OGS	OGS	online	INGV	yes+PQLX
OX	BOO	46.3195	13.0984	0.444		Bordano	2014-02-01T00:00:00		IT	Trillium_120	120	Q330	100	OGS	OGS	online	INGV	yes+PQLX
OX	CAE	46.009	12.4379	0.87		Caneva	2014-02-11T00:00:00		IT	Trillium_120	120	Q330	100	OGS	OGS	online	INGV	yes+PQLX
OX	CGRP	45.8806	11.8047	1.757		Cima Grappa	2002-01-01T00:00:00		IT	STS-2	120	Q330	100	OGS	OGS	online	INGV	yes+PQLX
OX	CIMO	46.3116	12.4448	0.61		Cimolais	2005-04-02T00:00:00		IT	STS-2	120	Q4120	100	OGS	OGS	online	INGV	yes+PQLX
OX	CLUD	46.4569	12.8814	0.635		Cludinico	2011-02-15T00:00:00		IT	Trillium_120	120	Q330	100	OGS	OGS	online	INGV	yes+PQLX
OX	DRE	46.1733	13.645	0.81		Drenchia	2010-04-15T00:00:00		IT	Trillium_40	40	Q330	100	OGS	OGS	online	INGV	yes+PQLX
OX	FERB	44.9	11.54	0.007	135	Ferrara	2012-04-06T00:00:00		IT	CMG-3TB	360	CMG_DM24	100	OGS	OGS	online	INGV	yes+PQLX	borehole
OX	FUSE	46.4142	13.0011	0.52		Fusea	2010-01-01T00:00:00		IT	Trillium_40	40	Q330	100	OGS	OGS	online	INGV	yes+PQLX
OX	MARN	45.6378	11.2099	0.785		Marana	2009-11-13T00:00:00		IT	Trillium_40	40	Q330	100	OGS	OGS	online	INGV	yes+PQLX
OX	MLN	46.1495	12.6154	0.814		Malnisio	2015-06-09T00:00:00		IT	Trillium_120	120	Q330	100	OGS	OGS	online	INGV	yes+PQLX
OX	MPRI	46.2408	12.9877	0.762		Monte Prat	2012-08-14T00:00:00		IT	Trillium_40	40	Q330	100	OGS	OGS	online	INGV	yes+PQLX
OX	PLRO	46.5491	13.1481	1.41		Paularo	2015-08-06T00:00:00		IT	Trillium_120	120	Q330	100	OGS	OGS	online	INGV	yes+PQLX
OX	PRED	46.4428	13.565	0.902		Cave del Predil	2010-07-20T00:00:00		IT	STS-2	120	Q330	100	OGS	OGS	online	INGV	yes+PQLX
OX	SABO	45.9875	13.6337	0.575		Monte Sabotino	2005-03-21T00:00:00		IT	STS-2	120	Q330	100	OGS	OGS	online	INGV	yes+PQLX
OX	VARN	45.9933	12.1048	1.265		Col Varnada	2013-09-10T00:00:00		IT	Trillium_120	120	Q330	100	OGS	OGS	online	INGV	yes+PQLX
OX	ZOU2	46.5584	12.9729	1.911		Zouf Plan	2008-10-13T00:00:00		IT	Trillium_120	120	Q330	100	OGS	OGS	online	INGV	yes+PQLX
RD	LOR	47.2683	3.8589	0.52		Lormes - 58	2013-06-19T00:00:00		FR	STS-2	120	CEA	20	CEA	CEA	online	RESIF	yes+PQLX	at the moment no HH channels available -- topic under discussion
RD	ORIF	44.9183	5.88	1.08		Oris en Rattier - 38	2013-01-18T02:00:00		FR	STS-2	120	CEA	20	CEA	CEA	online	RESIF	yes+PQLX	at the moment no HH channels available -- topic under discussion
RD	PGF	42.5483	8.9994	1.13		Pioggiola - 2B	2013-08-06T00:00:00		FR	STS-2	120	CEA	20	CEA	CEA	online	RESIF	yes+PQLX	at the moment no HH channels available -- topic under discussion
RF	GEPF	46.4258	13.1385	0.255		Gemona Piazza del Ferro	2006-05-24T00:00:00		IT	CMG-40T	30	Q330	100	Uni Trieste	Uni Trieste	online	INGV	no
SI	ABSI	46.7285	11.3205	1.801		Aberstueckl (Sarntal)	2006-11-21T14:16:46		IT	STS-2	120	Q330	100	CPB	ZAMG	online	INGV	no
SI	BOSI	46.4952	11.3185	0.242		Bozen/Zivilschutz Zentrale	2006-11-22T15:23:49		IT	STS-2	120	Q330	100	CPB	ZAMG	online	INGV	no
SI	KOSI	46.463	11.3778	1.604		Kohlern/Titschen	2006-11-22T19:38:45		IT	STS-2	120	Q330	100	CPB	ZAMG	online	INGV	no
SI	LUSI	45.9595	10.9436	0.8596		Trento/Gardasee	2012-09-19T00:00:00		IT	STS-2	120	Q330	100	CPB	ZAMG	online	INGV	no
SI	MOSI	46.6164	10.5495	1.957		Grossmontoni/Vinschgau	2006-11-28T12:34:04		IT	STS-2	120	Q330	100	CPB	ZAMG	online	INGV	no
SI	RISI	46.948	12.0787	1.785		Rein in Taufers/Ahrntal	2006-11-23T16:09:30		IT	STS-2	120	Q330	100	CPB	ZAMG	online	INGV	no
SI	ROSI	46.9281	11.4118	1.917		Rosskopf/Sterzing	2006-11-23T08:39:30		IT	STS-2	120	Q330	100	CPB	ZAMG	online	INGV	no
SK	MODS	48.3736	17.2774	0.52		Modra - Piesok	2004-01-01T00:00:00		SK	STS-2	120	MicroStep-MIS_Wave32	100	ESI SAS	ESI SAS	online	GFZ	no	was down for digitizer upgrade 2016.054-097
SK	VYHS	48.494	18.8361	0.48		Vyhne	2004-03-18T00:00:00		SK	STS-2	120	MicroStep-MIS_Wave24	100	ESI SAS	ESI SAS	online	GFZ	no	between 2015.070 and 2016.071 sensor Guralp-6T-30S
SK	ZST	48.1961	17.1025	0.25		Zelezna Studnicka	2004-03-18T00:00:00		SK	3x_Kirnos_SKD	30	MicroStep-MIS_Wave24	100	ESI SAS	ESI SAS	online	GFZ	no
SL	BOJS	45.5043	15.2518	0.252	4	Bojanci	2004-02-20T00:00:00		SI	STS-2	120	Q330	200	ARSO	ARSO	online	ORFEUS	as ORFEUS
SL	CADS	46.2281	13.7368	0.751	4	Cadrg	2003-07-10T00:00:00		SI	CMG-3ESPC	120	Q730	200	ARSO	ARSO	online	ORFEUS	as ORFEUS
SL	CEY	45.7381	14.4221	0.579		Cerknica	2001-03-30T00:00:00		SI	CMG-3ESPC	120	Q330HR	200	ARSO	ARSO	online	ORFEUS	as ORFEUS	Q730 until 2016.10.20. 08:00:01
SL	CRES	45.826	15.4569	0.431	4	Cresnjevec	2002-04-02T00:00:00		SI	STS-2	120	Q330	200	ARSO	ARSO	online	ORFEUS	as ORFEUS
SL	CRNS	46.0807	14.2613	0.712	4	Crni Vrh	2005-12-16T00:00:00		SI	CMG-3ESP	120	Q730	200	ARSO	ARSO	online	ORFEUS	as ORFEUS
SL	DOBS	46.1495	15.4695	0.432	4	Dobrina	2001-04-07T00:00:00		SI	CMG-3ESP	120	Q730	200	ARSO	ARSO	online	ORFEUS	as ORFEUS
SL	GBAS	45.9348	14.4434	0.525	4	Gorenja Brezovica	2008-05-27T00:00:00		SI	CMG-3ESP	120	Q330HR	200	ARSO	ARSO	online	ORFEUS	as ORFEUS	Q730 until 2016.09.07. 08:00:01
SL	GBRS	45.5311	14.8101	0.61	4	Gornja Briga	2007-04-18T00:00:00		SI	CMG-40T	30	Q730	200	ARSO	ARSO	online	ORFEUS	as ORFEUS
SL	GCIS	45.8672	15.6274	0.392	4	Gornji Cirnik	2003-08-11T00:00:00		SI	CMG-3ESPC	120	Q730	200	ARSO	ARSO	online	ORFEUS	as ORFEUS
SL	GOLS	46.0108	15.6245	0.559	17	Golise	2002-04-02T00:00:00		SI	CMG-40TB	30	Centaur	200	ARSO	ARSO	online	ORFEUS	as ORFEUS	borehole -- Q730 until 2017.09.05 09:00:00
SL	GORS	46.3174	13.9998	1.047	4	Gorjuse	2004-05-17T00:00:00		SI	CMG-3T	360	Q330	200	ARSO	ARSO	online	ORFEUS	as ORFEUS
SL	GROS	46.461	15.5017	0.93	4	Grobnik	2002-12-12T00:00:00		SI	CMG-3ESP	120	Q730	200	ARSO	ARSO	online	ORFEUS	as ORFEUS
SL	JAVS	45.8934	14.0643	1.12	4	Javornik	2003-08-21T00:00:00		SI	CMG-3ESPC	120	Q330	200	ARSO	ARSO	online	ORFEUS	as ORFEUS
SL	KNDS	45.5277	14.3795	1.017	4	Knezji Dol	2003-10-14T00:00:00		SI	STS-2	120	Q330	200	ARSO	ARSO	online	ORFEUS	as ORFEUS
SL	KOGS	46.4481	16.2504	0.245	4	Kog	2004-01-26T00:00:00		SI	CMG-3ESPC	120	Q330	200	ARSO	ARSO	online	ORFEUS	as ORFEUS
SL	LEGS	45.9488	15.3177	0.39	15	Legarje	2002-09-02T00:00:00		SI	CMG-40TB	30	Q730	200	ARSO	ARSO	online	ORFEUS	as ORFEUS	borehole
SL	LJU	46.0438	14.5278	0.396	2	Ljubljana	2001-03-30T00:00:00		SI	STS-2	120	Q330	200	ARSO	ARSO	online	ORFEUS	as ORFEUS
SL	MOZS	46.2941	14.4433	0.689	4	Mozjanca	2005-07-07T00:00:00		SI	CMG-3ESPC	120	Q330	200	ARSO	ARSO	online	ORFEUS	as ORFEUS
SL	PDKS	46.0612	14.9977	0.708	16	Podkum	2002-11-11T00:00:00		SI	CMG-40TB	30	Q730	200	ARSO	ARSO	online	ORFEUS	as ORFEUS	borehole
SL	PERS	46.6365	15.1139	0.81	4	Pernice	2002-12-14T00:00:00		SI	CMG-3ESPC	120	Q330HR	200	ARSO	ARSO	online	ORFEUS	as ORFEUS	Q730 digitizer until 2016.07.19 08:40
SL	ROBS	46.2445	13.5095	0.256		Robic	2002-11-20T00:00:00		SI	CMG-3ESPC	120	Q730	200	ARSO	ARSO	online	ORFEUS	as ORFEUS
SL	SKDS	45.5464	14.0143	0.552	4	Skadanscina	2006-04-12T00:00:00		SI	STS-2	120	Q330	200	ARSO	ARSO	online	ORFEUS	as ORFEUS
SL	VISS	45.8033	14.8393	0.399	4	Visnje	2003-08-14T00:00:00		SI	CMG-3ESPC	120	Q330	200	ARSO	ARSO	online	ORFEUS	as ORFEUS
SL	VNDS	46.1016	14.7014	0.522	14	Vrh pri Dolskem	2006-02-14T00:00:00		SI	CMG-3TBH	120	Q330	200	ARSO	ARSO	online	ORFEUS	as ORFEUS	borehole
SL	VOJS	46.0322	13.8878	1.07	4	Vojsko	2004-07-30T00:00:00		SI	CMG-3ESPC	120	Q330HR	200	ARSO	ARSO	online	ORFEUS	as ORFEUS	Q730 until 2016.09.15. 09:00:01
SL	ZALS	46.4342	15.0246	0.741	4	Zalesnik	2008-08-11T00:00:00		SI	CMG-40T	30	Q730	200	ARSO	ARSO	online	ORFEUS	as ORFEUS	code not registered with ISC
SL	ZAVS	46.4342	15.0246	0.741	17	Zavodnje	2005-08-11T00:00:00	2008-08-11T00:00:00	SI	CMG-40TB	30	Q730	200	ARSO	ARSO	closed	ORFEUS	as ORFEUS	borehole
ST	DOSS	45.8808	11.1884	1.66			2014-08-06T00:00:00		IT	Trillium_40	40	Q330	100	Autonomous Province of Trento	INGV	online	INGV	SQLX
ST	GAGG	46.0835	10.9587	1.617		Gaggia	2013-11-19T00:00:00		IT	Trillium_40	40	Q330	100	Autonomous Province of Trento	INGV	online	INGV	SQLX
								1							online	350
															offline	2
															closed	1
