# Supplementary material for: The AlpArray Seismic Network: A Large-Scale European Experiment to Image the Alpine Orogen
Source: Surv Geophys. 2018 Apr 18;39(5):1009–33. doi: 10.1007/s10712-018-9472-4 (PMC6428228; doi:10.1007/s10712-018-9472-4)
Supplement: Supplementary file 3 — Supplementary material 3 (XLS 136 kb) [file 10712_2018_9472_MOESM3_ESM.xls]

## Sheet: AlpArray_temp.sta.
Network code	Station name	Latitude [° WGS84]	Longitude [° WGS84]	Elevation [km]	Site Name	StartTime	EndTime	Country of deployment	Housing Class*	Sensor sits on: [bedrock; cement; tiles; else: please specify]	Sensor type	Sensor lower corner period [s]	Digitizer type	Sampling rate	Instrument owner	Deploying group	online/offline	EIDA node for data distribution [BGR; ETH; GFZ; INGV; IPGP; LMU; ORFEUS; RESIF]	PSD PDF availability [yes+PQLX; yes+other software; no]	Notes
CR	PLIT	44.8784	15.6231	0.616	Plitvice	2015-09-29T09:00:00		HR	Building	cement	CMG-3ESPC	60	CMG	50	PMF	PMF	online	ORFEUS	no	records 50sps -- 100sps only in triggered mode
CR	RABC	44.7504	14.7821	0.016	Rab	2015-06-25T12:00:00		HR	Building	cement	CMG-6T	30	CMG	50	PMF	PMF	online	ORFEUS	no	records 50sps -- 100sps only in triggered mode
CR	SMRN	45.0361	14.1549	0.17	Sveta Marina	2015-09-24T15:00:00		HR	Building	cement	CMG-6T	30	CMG	50	PMF	PMF	online	ORFEUS	no	records 50sps -- 100sps only in triggered mode
CR	VIRC	44.302	15.054	0.05	Vir	2016-03-17T00:00:00		HR	Building	cement	CMG-40T	30	CMG_DM24	50	PMF	PMF	online	ORFEUS	no	records 50sps -- 100sps only in triggered mode
Z3	A001A	48.7287	16.5904	0.337	Falkenstein	2015-05-06T00:00:00		AT	Underground shelter	cement	Reftek151_60	60	Reftek_130S	100	U Vienna	U Vienna	online	ORFEUS	yes+ObsPy	also streaming 1sps
Z3	A002A	48.3175	16.6152	0.162	Strasshof	2015-10-16T00:00:00	2016-06-02T17:00:00	AT	Building	cement	Reftek151_60	60	Reftek_130	100	U Vienna	U Vienna	closed	ORFEUS	yes+ObsPy	also streaming 1sps
Z3	A002B	48.3629	16.5942	0.187	Bockfließ	2016-06-14T14:00:00		AT	Underground shelter	cement in soil	Reftek151_60	60	Reftek_130	100	U Vienna	U Vienna	online	ORFEUS	yes+ObsPy	also streaming 1sps
Z3	A003A	47.7589	17.053	0.116	Andau	2015-10-28T00:00:00		AT	Building	cement	Reftek151_60	60	Reftek_130	100	U Vienna	U Vienna	online	ORFEUS	yes+ObsPy	also streaming 1sps
Z3	A004A	47.9629	16.3968	0.2	Ebreichsdorf	2015-11-02T00:00:00		AT	Other: Castle	cement	Reftek151_60	60	Reftek_130	100	U Vienna	U Vienna	online	ORFEUS	yes+ObsPy	also streaming 1sps -- another station existed at this site since 2013.10.03
Z3	A005A	48.3784	16.1207	0.176	Schmida	2015-03-25T00:00:00	2016-05-25T10:00:00	AT	Urban free field	cement	Reftek151_60	60	Reftek_130	100	U Vienna	U Vienna	closed	ORFEUS	yes+ObsPy	also streaming 1sps
Z3	A005B	48.3719	16.2054	0.174	Stockerau	2016-05-25T14:00:00		AT	Underground shelter	hard soil	Reftek151_60	60	Reftek_130	100	U Vienna	U Vienna	online	ORFEUS	yes+ObsPy	also streaming 1sps
Z3	A006A	48.7404	16.0203	0.23	Kleinriedenthal	2015-03-25T00:00:00		AT	Underground shelter	cement in soil	Reftek151_60	60	Reftek_130	100	U Vienna	U Vienna	online	ORFEUS	yes+ObsPy	also streaming 1sps
Z3	A007A	48.7162	15.5288	0.484	Messern	2015-07-07T00:00:00		AT	Other: Castle	cement on bedrock	Reftek151_60	60	Reftek_130S	100	U Vienna	U Vienna	online	ORFEUS	yes+ObsPy	also streaming 1sps
Z3	A008A	48.3687	15.6522	0.242	Tiefenfucha	2015-03-23T00:00:00		AT	Urban free field	cement on soil	Reftek151_60	60	Reftek_130	100	U Vienna	U Vienna	online	ORFEUS	yes+ObsPy	also streaming 1sps
Z3	A009A	47.6775	16.0904	0.469	Wartmannstetten	2015-02-10T00:00:00		AT	Underground shelter	cement	Reftek151_60	60	Reftek_130	100	U Vienna	U Vienna	online	ORFEUS	yes+ObsPy	also streaming 1sps
Z3	A010A	47.0733	16.0793	0.266	Fuerstenfeld	2015-11-11T00:00:00		AT	Building	cement	Reftek151_60	60	Reftek_130	100	U Vienna	U Vienna	online	ORFEUS	yes+ObsPy	also streaming 1sps
Z3	A011A	47.3908	16.0077	0.507	Rohrbach a.d. Lafnitz	2015-07-10T00:00:00	2016-06-29T13:00:00	AT	Urban free field	cement	Reftek151_60	60	Reftek_130S	100	U Vienna	U Vienna	closed	ORFEUS	yes+ObsPy	also streaming 1sps
Z3	A011B	47.4086	15.9587	0.556	Reinberg	2016-06-29T16:30:00		AT	Building	stone patches in cement	Reftek151_60	60	Reftek_130S	100	U Vienna	U Vienna	online	ORFEUS	yes+ObsPy	also streaming 1sps
Z3	A012A	47.604	15.586	1.28	Langenwang	2015-07-02T00:00:00		AT	Building	cement	Reftek151_60	60	Reftek_130S	100	U Vienna	U Vienna	online	ORFEUS	yes+ObsPy	also streaming 1sps
Z3	A013A	48.0635	15.4063	0.53	Umbach	2015-06-26T00:00:00		AT	Building	cement	Reftek151_60	60	Reftek_130S	100	U Vienna	U Vienna	online	ORFEUS	yes+ObsPy	also streaming 1sps
Z3	A014A	48.3483	15.1619	0.773	Thumling	2015-06-26T00:00:00		AT	Building	cement in soil	Reftek151_60	60	Reftek_130	100	U Vienna	U Vienna	online	ORFEUS	yes+ObsPy	also streaming 1sps
Z3	A015A	48.9334	14.9936	0.5	Langauhaeuser - Niederoesterreich - Austria	2015-09-07T00:00:00		AT	Urban free field	cement	Trillium_240	240	EarthData_EDR-210	100	GFZ	GFZ	online	GFZ	yes+PQLX	http://www.gfz-potsdam.de/en/section/geophysical-deep-sounding/infrastructure/geophysical-instrument-pool-potsdam-gipp/instruments/seismic-pool/recorder-earthdata-edr-210/
Z3	A016A	48.3014	14.6496	0.565	Allerheiligen	2015-06-23T00:00:00		AT	Building	tiles	Reftek151_60	60	Reftek_130S	100	U Vienna	U Vienna	online	ORFEUS	yes+ObsPy	also streaming 1sps
Z3	A017A	47.948	14.7589	0.589	Waidhofen a.d. Ybbs	2015-07-09T00:00:00		AT	Urban free field	cement	Reftek151_60	60	Reftek_130S	100	U Vienna	U Vienna	online	ORFEUS	yes+ObsPy	also streaming 1sps
Z3	A018A	47.7437	15.0776	0.748	Rothwald	2015-06-25T00:00:00		AT	Building	cement	Reftek151_60	60	Reftek_130S	100	U Vienna	U Vienna	online	ORFEUS	yes+ObsPy	also streaming 1sps
Z3	A019A	47.4457	15.0856	1.125	Kaintal	2015-07-01T00:00:00		AT	Urban free field	cement	Reftek151_60	60	Reftek_130S	100	U Vienna	U Vienna	online	ORFEUS	yes+ObsPy	also streaming 1sps
Z3	A020A	46.9484	15.2994	0.39	Lannach	2015-10-01T00:00:00		AT	Building	cement	Reftek151_60	60	Reftek_130	100	U Vienna	U Vienna	online	ORFEUS	yes+ObsPy	also streaming 1sps
Z3	A021A	46.7566	15.8253	0.265	Deutsch Goritz	2015-09-30T00:00:00		AT	Urban free field	cement	Reftek151_60	60	Reftek_130	100	U Vienna	U Vienna	online	ORFEUS	yes+ObsPy	also streaming 1sps
Z3	A022A	48.6348	14.7326	0.777	Hirschenstein - Niederoesterreich - Austria	2015-09-07T00:00:00		AT	Urban free field	cement	Trillium_240	240	EarthData_EDR-210	100	GFZ	GFZ	online	GFZ	yes+PQLX	http://www.gfz-potsdam.de/en/section/geophysical-deep-sounding/infrastructure/geophysical-instrument-pool-potsdam-gipp/instruments/seismic-pool/recorder-earthdata-edr-210/
Z3	A023A	48.4608	14.0707	0.587	Baumgartsaur - Oberoesterreich - Austria	2015-09-07T00:00:00		AT	Underground shelter	tiles	Trillium_240	240	EarthData_EDR-210	100	GFZ	GFZ	online	GFZ	yes+PQLX	http://www.gfz-potsdam.de/en/section/geophysical-deep-sounding/infrastructure/geophysical-instrument-pool-potsdam-gipp/instruments/seismic-pool/recorder-earthdata-edr-210/
Z3	A024A	48.2131	14.1367	0.303	Marchtrenk	2015-06-24T00:00:00	2016-08-30T18:00:00	AT	Building	cement	Reftek151_60	60	Reftek_130S	100	U Vienna	U Vienna	closed	ORFEUS	yes+ObsPy	also streaming 1sps
Z3	A024B	48.1002	14.1399	0.381	Sipbachzell	2016-08-31T15:00:00		AT	Building	cement	Reftek151_60	60	Reftek_130S	100	U Vienna	U Vienna	online	ORFEUS	yes+ObsPy	also streaming 1sps
Z3	A025A	47.5207	14.4165	0.794	Baerendorf - Steiermark - Austria	2015-09-07T00:00:00		AT	Underground shelter	cement	Trillium_240	240	EarthData_EDR-210	100	GFZ	GFZ	online	GFZ	yes+PQLX	http://www.gfz-potsdam.de/en/section/geophysical-deep-sounding/infrastructure/geophysical-instrument-pool-potsdam-gipp/instruments/seismic-pool/recorder-earthdata-edr-210/
Z3	A026A	46.9332	14.5516	0.8	Unterfahrungsstollen - Kaernten - Austria	2015-09-07T00:00:00		AT	Tunnel	cement	Trillium_240	240	EarthData_EDR-210	100	GFZ	GFZ	online	GFZ	yes+PQLX	http://www.gfz-potsdam.de/en/section/geophysical-deep-sounding/infrastructure/geophysical-instrument-pool-potsdam-gipp/instruments/seismic-pool/recorder-earthdata-edr-210/
Z3	A027A	46.8159	14.0074	1.217	Holzern - Kaernten - Austria	2015-09-07T00:00:00		AT	Urban free field	cement	Trillium_240	240	EarthData_EDR-210	100	GFZ	GFZ	online	GFZ	yes+PQLX	http://www.gfz-potsdam.de/en/section/geophysical-deep-sounding/infrastructure/geophysical-instrument-pool-potsdam-gipp/instruments/seismic-pool/recorder-earthdata-edr-210/
Z3	A028A	47.1029	13.9958	1.105	Falkendorf - Steiermark - Austria	2015-09-07T00:00:00		AT	Urban free field	cement	Trillium_240	240	EarthData_EDR-210	100	GFZ	GFZ	online	GFZ	yes+PQLX	http://www.gfz-potsdam.de/en/section/geophysical-deep-sounding/infrastructure/geophysical-instrument-pool-potsdam-gipp/instruments/seismic-pool/recorder-earthdata-edr-210/
Z3	A029A	47.4301	13.761	0.992	Rabinger - Steiermark - Austria	2015-09-07T00:00:00		AT	Urban free field	cement	Trillium_240	240	EarthData_EDR-210	100	GFZ	GFZ	online	GFZ	yes+PQLX	http://www.gfz-potsdam.de/en/section/geophysical-deep-sounding/infrastructure/geophysical-instrument-pool-potsdam-gipp/instruments/seismic-pool/recorder-earthdata-edr-210/
Z3	A030A	47.8277	13.5612	0.64	Steinbach	2015-11-12T00:00:00		AT	Underground shelter	cement	Trillium_Compact	120	Reftek_130	100	LMU	LMU	online	LMU	yes+ObsPy
Z3	A031A	48.4272	13.4975	0.366	Wolfsedt - Oberoesterreich - Austria	2015-09-07T00:00:00		AT	Underground shelter	tiles	Trillium_240	240	EarthData_EDR-210	100	GFZ	GFZ	online	GFZ	yes+PQLX	http://www.gfz-potsdam.de/en/section/geophysical-deep-sounding/infrastructure/geophysical-instrument-pool-potsdam-gipp/instruments/seismic-pool/recorder-earthdata-edr-210/
Z3	A032A	48.123	13.3063	0.608	Johann am Walde	2015-12-03T00:00:00		AT	Building	cement	Trillium_Compact	120	Reftek_130	100	LMU	LMU	online	LMU	yes+ObsPy
Z3	A033A	47.4797	13.126	0.827	Bluehnbach	2015-08-27T00:00:00		AT	Building	cement	Trillium_Compact	120	Reftek_130	100	LMU	LMU	online	LMU	yes+ObsPy
Z3	A034A	46.9091	13.0787	1.05	Stadlberg - Tirol - Austria	2015-09-07T00:00:00		AT	Urban free field	cement	Trillium_240	240	EarthData_EDR-210	100	GFZ	GFZ	online	GFZ	yes+PQLX	http://www.gfz-potsdam.de/en/section/geophysical-deep-sounding/infrastructure/geophysical-instrument-pool-potsdam-gipp/instruments/seismic-pool/recorder-earthdata-edr-210/
Z3	A035A	47.1968	12.7209	1.652	Wasserfallboden	2015-10-15T00:00:00		AT	Tunnel	rock	Trillium_Compact	120	Reftek_130	100	LMU	LMU	online	LMU	yes+ObsPy
Z3	A036A	47.3789	12.3084	1.02	Aschau iT	2015-12-09T00:00:00		AT	Underground shelter	cement	Trillium_Compact	120	Reftek_130	100	LMU	LMU	online	LMU	yes+ObsPy
Z3	A037A	47.0703	10.2643	2.02	Kartellspeicher	2015-10-29T00:00:00		AT	Underground shelter	cement	Trillium_Compact	120	Reftek_130	100	LMU	LMU	online	LMU	yes+ObsPy
Z3	A038A	47.4642	11.9188	0.578	Kramsach	2016-01-20T15:00:00		AT	Building	cement	CMG-3T	120	CMG_DM24_MK2	100	U Kiel	U Kiel	offline	BGR	yes+PQLX
Z3	A050A	44.4818	16.5313	0.934	Klekovaca - Republika Srpska - Bosnia and Herzegovina	2015-11-25T15:30:00		BH	Free field	cement	STS-2	120	Taurus	100	ETHZ	ETHZ	online	ETH	yes+PQLX
Z3	A051A	45.0125	16.9069	0.862	Vila Mrakovica - Republika Srpska - Bosnia and Herzegovina	2015-11-25T15:00:00		BH	Building	cement	STS-2	120	Taurus	100	ETHZ	ETHZ	online	ETH	yes+PQLX
Z3	A052A	45.1026	17.5139	0.139	Srbac - Republika Srpska - Bosnia and Herzegovina	2015-11-26T17:00:00		BH	Free field	cement	STS-2	120	Taurus	100	ETHZ	ETHZ	online	ETH	yes+PQLX
Z3	A060A	47.0305	7.8904	1.161	Wasen - Napf - BE	2015-08-14T14:00:00	2017-02-16T10:00:00	CH	Free field	cement	STS-2	120	Taurus	100	ETHZ	ETHZ	closed	ETH	yes+PQLX
Z3	A060B	46.993	7.97764	1.049	Romoos - Napf - LU	2017-05-09T12:30:00		CH	Building	cement	STS-2	120	Taurus	100	ETHZ	ETHZ	online	ETH	yes+PQLX
Z3	A061A	47.098	8.9252	0.961	Innerthal - SZ	2015-10-14T16:00:00		CH	Tunnel	cement	STS-2	120	Taurus	100	ETHZ	ETHZ	online	ETH	yes+PQLX
Z3	A062A	46.1808	9.1126	1.783	Arbedo Castione - Alpe di Gesero - TI	2015-11-17T15:00:00		CH	Building	cement	STS-2	120	Taurus	100	ETHZ	ETHZ	online	ETH	yes+PQLX
Z3	A071A	49.7419	12.6911	0.502	Stare Sedliste	2015-10-27T09:30:00		CZ	Building	stone tiles	CMG-3T	120	GAIA_1	100	IG-ASCR	IG-ASCR	offline	ORFEUS	yes+ObsPy
Z3	A072A	49.4683	13.1735	0.495	Chudenice	2015-08-27T08:30:00		CZ	Free field	bricks	STS-2	120	GAIA_1	100	IG-ASCR	IG-ASCR	offline	ORFEUS	yes+ObsPy	until 2015-09-12T11:30:00 digitizer was Gaia 2T
Z3	A073A	49.9916	13.2331	0.407	Manetin	2015-09-23T10:20:00		CZ	Free field	stone pillar	STS-2	120	GAIA_1	100	IG-ASCR	IG-ASCR	offline	ORFEUS	yes+ObsPy
Z3	A074A	49.6715	13.5309	0.385	Kozel	2015-10-02T09:10:00		CZ	Underground shelter	tiles on cement	STS-2	120	GAIA_1	100	IG-ASCR	IG-ASCR	offline	ORFEUS	yes+ObsPy
Z3	A075A	50.0377	13.8737	0.285	Krivoklat	2015-10-06T08:00:00		CZ	Building	cement	STS-2	120	GAIA_1	100	IG-ASCR	IG-ASCR	offline	ORFEUS	yes+ObsPy
Z3	A076A	49.6168	14.1494	0.532	Makova Hora	2015-09-08T09:50:00		CZ	Urban free field	cement pillar	CMG-3T	120	GAIA_1	100	IG-ASCR	IG-ASCR	offline	ORFEUS	yes+ObsPy
Z3	A077A	49.2705	14.0739	0.37	Kestrany	2015-11-03T14:40:00		CZ	Free field	cement	CMG-3ESP	30	GAIA_1	100	IG-ASCR	IG-ASCR	offline	ORFEUS	yes+ObsPy
Z3	A078A	48.864	14.2845	1.06	Kleť	2015-10-20T11:40:00		CZ	Other: In a plastic box at ground level	cement	CMG-3ESP	30	GAIA_1	100	IG-ASCR	IG-ASCR	offline	ORFEUS	yes+ObsPy
Z3	A079A	49.2288	14.7074	0.438	Drachov	2015-10-15T09:40:00		CZ	Building	stone tiles	STS-2	120	GAIA_3	100	IG-ASCR	IG-ASCR	offline	ORFEUS	yes+ObsPy
Z3	A080A	49.684	14.9288	0.502	Loreta	2015-10-12T08:30:00		CZ	Building	cement	STS-2	120	GAIA_1	100	IG-ASCR	IG-ASCR	offline	ORFEUS	yes+ObsPy
Z3	A081A	50.0752	15.0341	0.228	Dobrichov	2015-09-25T08:20:00		CZ	Free field	niche in stone wall	STS-2	120	GAIA_1	100	IG-ASCR	IG-ASCR	offline	ORFEUS	yes+ObsPy
Z3	A082A	50.061	15.6502	0.22	Zivanice	2015-10-08T10:30:00		CZ	Building	cement	STS-2	120	GAIA_1	100	IG-ASCR	IG-ASCR	offline	ORFEUS	yes+ObsPy
Z3	A083A	49.6959	15.6077	0.573	Cachotin	2015-10-16T13:20:00		CZ	Building	tiles on cement	STS-2	120	GAIA_1	100	IG-ASCR	IG-ASCR	offline	ORFEUS	yes+ObsPy
Z3	A084A	48.9434	15.7007	0.403	Bitov	2015-09-22T09:20:00		CZ	Building	tiles on cement	STS-2	120	GAIA_1	100	IG-ASCR	IG-ASCR	offline	ORFEUS	yes+ObsPy
Z3	A085A	49.4392	16.1962	0.458	Strazek	2015-10-07T08:20:00		CZ	Building	tiles on cement	STS-2	120	GAIA_1	100	IG-ASCR	IG-ASCR	offline	ORFEUS	yes+ObsPy
Z3	A086A	49.8528	16.1457	0.391	Nove Hrady	2015-09-19T12:10:00		CZ	Free field	stone desk on brick floor	STS-2	120	GAIA_1	100	IG-ASCR	IG-ASCR	offline	ORFEUS	yes+ObsPy
Z3	A087A	49.7049	16.8893	0.43	Bouzov	2015-09-19T09:10:00		CZ	Free field	tiles on cement	STS-2	120	GAIA_3	100	IG-ASCR	IG-ASCR	offline	ORFEUS	yes+ObsPy
Z3	A088A	49.4303	17.2911	0.211	Tovacov	2015-09-24T08:00:00		CZ	Building	cement	STS-2	120	GAIA_1	100	IG-ASCR	IG-ASCR	offline	ORFEUS	yes+ObsPy
Z3	A089A	49.1521	17.092	0.263	Nesovice	2015-11-08T12:40:00		CZ	Free field	cement	STS-2	120	GAIA_1	100	IG-ASCR	IG-ASCR	offline	ORFEUS	yes+ObsPy
Z3	A090A	49.3655	17.8278	0.659	Maruska	2015-09-24T14:10:00	2015-12-02T14:30:00	CZ	Borehole	cement	CMG-40T	30	GAIA_1	100	IG-ASCR	IG-ASCR	closed	ORFEUS	yes+ObsPy	until 2015-12-02T14:30:00 sensor was CMG-3ESP (30s)
Z3	A100A	48.453	8.92609	0.508	Rottenburg / Weiler	2015-11-16T00:00:00		DE	Building	tiles on cement	STS-2	120	EarthData_PR-24	100	U Bochum	U Bochum	online	BGR	yes+PQLX	online since 2016.11.22
Z3	A101A	48.1182	8.55019	0.741	Rottweil / Deisslingen	2015-11-13T00:00:00	2016-11-07T09:54:49	DE	Building	tiles on cement	CMG-3ESPC	120	EarthData_PR-24	100	U Bochum	U Bochum	closed	BGR	yes+PQLX
Z3	A101B	48.1182	8.55019	0.741	Rottweil / Deisslingen	2016-07-02T00:00:00		DE	Building	tiles on cement	Trillium_40	120	EarthData_PR-24	100	U Bochum	U Bochum	online	BGR	yes+PQLX
Z3	A102A	48.14	9.19935	0.684	Sigmaringen / Junganu	2015-11-13T00:00:00		DE	Building	cement	STS-2	120	EarthData_PR-24	100	U Bochum	U Bochum	online	BGR	yes+PQLX	online since 2016.11.22
Z3	A103A	47.8102	9.52212	0.547	Ravensburg / Horgenzell	2015-11-08T00:00:00		DE	Building	cement	CMG-3ESPC	120	EarthData_PR-24	100	U Bochum	U Bochum	online	BGR	yes+PQLX	online since 2016.11.22
Z3	A103B	47.8102	9.52224	0.547	Ravensburg / Schmalleg	2016-11-08T14:00:00	2017-04-02T14:00:00	DE	Free field	cement	CMG-3ESPC	120	EarthData_PR-24	100	U Bochum	U Bochum	closed	BGR	yes+PQLX
Z3	A104A	48.0628	9.71035	0.575	Biberach / Stafflangen	2015-11-10T00:00:00		DE	Building	tiles on cement	STS-2	120	EarthData_PR-24	100	U Bochum	U Bochum	online	BGR	yes+PQLX	online since 2016.11.22
Z3	A104B	48.0757	9.7032	0.588	Biberach / Stafflangen 2	2016-11-09T12:00:00	2017-08-22T09:00:00	DE	Building	tiles on cement	STS-2	120	EarthData_PR-24	100	U Bochum	U Bochum	closed	BGR	yes+PQLX
Z3	A104C	48.1266	9.65663	0.655	Biberach / Ahlen	2017-08-23T09:00:00		DE	Building	tiles on cement	STS-2	120	EarthData_PR-24	100	U Bochum	U Bochum	online	BGR	yes+PQLX
Z3	A105A	47.407	10.2934	0.89	Obersdorf / Schattenberg	2015-11-09T00:00:00		DE	Building	tiles on cement	CMG-3ESPC	120	EarthData_PR-24	100	U Bochum	U Bochum	online	BGR	yes+PQLX
Z3	A106A	48.7533	9.7218	0.471	Goeppingen / Maitis	2015-11-16T00:00:00	2016-06-30T11:05:41	DE	Free field	cement on soil	CMG-3ESPC	120	EarthData_PR-24	100	U Bochum	U Bochum	closed	BGR	yes+PQLX
Z3	A106B	48.7534	9.72194	0.468	Goeppingen / Maitis	2016-06-30T11:13:37		DE	Building	tiles on cement	CMG-3ESPC	120	EarthData_PR-24	100	U Bochum	U Bochum	online	BGR	yes+PQLX
Z3	A107A	48.0311	10.2272	0.684	Memmingen / Holzguenz	2015-11-09T08:48:47	2017-06-18T23:59:59	DE	Building	tiles on cement	CMG-3ESPC	120	EarthData_PR-24	100	U Bochum	U Bochum	closed	BGR	yes+PQLX	A107B was a test site -- the data is not to be used
Z3	A107C	48.0194	10.1998	0.667	Memmingen / Eisenburg	2017-06-19T00:00:00		DE	Building	tiles on cement	CMG-3ESPC	120	EarthData_PR-24	100	U Bochum	U Bochum	online	BGR	yes+PQLX
Z3	A107D	48.0175	10.1944	0.631	Memmingen / Eisenburg2	2017-04-04T14:00:00		DE	Building	tiles on cement	CMG-3ESPC	120	EarthData_PR-24	100	U Bochum	U Bochum	online	BGR	yes+PQLX
Z3	A108A	48.3477	9.83113	0.564	Ulm / Ringingen	2015-11-11T00:00:00		DE	Building	tiles on cement	STS-2	120	EarthData_PR-24	100	U Bochum	U Bochum	online	BGR	yes+PQLX
Z3	A109A	48.4438	9.45858	0.665	Bad Urach / Seeburg	2015-11-12T00:00:00		DE	Building	tiles on cement	STS-2	120	EarthData_PR-24	100	U Bochum	U Bochum	online	BGR	yes+PQLX	online since 2016.11.22
Z3	A110A	49.777	8.729	0.327	Ernsthofen	2015-10-23T00:00:00		DE	Building	cement	Trillium_Compact	120	Taurus	100	U Frankfurt	U Frankfurt	offline	GFZ	no
Z3	A111A	49.8478	10.2132	0.249	Schloss Hallburg	2015-10-23T09:30:00		DE	Building	tiles on cement	Trillium_120P	120	Taurus	100	U Frankfurt	U Frankfurt	offline	GFZ	no
Z3	A112A	49.6499	7.90856	0.434	Ruppertsecken	2015-10-30T11:48:00		DE	Building	cement	Trillium_120PA	120	Taurus	100	U Frankfurt	U Frankfurt	offline	GFZ	no
Z3	A113A	49.546	8.72964	0.359	Buchklingen	2015-11-05T12:42:00		DE	Building	tiles on cement	Trillium_Compact	120	Taurus	100	U Frankfurt	U Frankfurt	offline	GFZ	no
Z3	A114A	49.5901	9.1824	0.466	Preunschen	2015-11-05T16:00:00		DE	Other: Cellar	cement	Trillium_120P	120	Taurus	100	U Frankfurt	U Frankfurt	offline	GFZ	no
Z3	A115A	49.274	9.05236	0.277	Bad Rappenau	2015-10-26T14:00:00		DE	Building	cement	Trillium_120P	120	Taurus	100	U Frankfurt	U Frankfurt	offline	GFZ	no
Z3	A116A	49.398	9.48334	0.323	Ravenstein	2015-11-03T12:30:00		DE	Building	cement	Trillium_Compact	120	Taurus	100	U Frankfurt	U Frankfurt	offline	GFZ	no
Z3	A117A	49.0441	9.56839	0.494	Großerlach	2015-11-04T13:45:00		DE	Building	cement	Trillium_120P	120	Taurus	100	U Frankfurt	U Frankfurt	offline	GFZ	no
Z3	A118A	49.3542	9.96992	0.453	Schrozberg	2015-11-03T16:00:00	2016-11-08T00:00:00	DE	Other: Cellar	cement	Trillium_120PA	120	Taurus	100	U Frankfurt	U Frankfurt	closed	GFZ	no	data loss 2016.Apr-Nov.10 -- station moved
Z3	A118B	49.3447	9.97441	0.461	Schrozberg	2016-11-09T00:00:00		DE	Other: Cellar	cement	Trillium_120PA	120	Taurus	100	U Frankfurt	U Frankfurt	offline	GFZ	no
Z3	A119A	49.0071	10.0384	0.562	Pilgerheim Rosenberg/Hohenberg	2015-11-04T09:00:00		DE	Building	tiles on cement	Trillium_120PA	120	Taurus	100	U Frankfurt	U Frankfurt	offline	GFZ	no
Z3	A121A	47.8356	7.7256	0.394	Sulzburg - Germany	2016-07-25T09:00:00		DE	Free field	cement	STS-2	120	EarthData_PR-24	100	KIT	KIT	offline	BGR	yes+PQLX
Z3	A122A	48.2784	7.8679	0.3	Schmieheim - Germany	2016-02-22T15:00:00		DE	Free field	cement	STS-2	120	EarthData_PR-24	100	KIT	KIT	offline	BGR	yes+PQLX
Z3	A123A	48.6116	7.891	0.138	Kehl - Germany	2016-02-26T13:00:00		DE	Building	cement	STS-2	120	EarthData_PR-24	100	KIT	KIT	offline	BGR	yes+PQLX
Z3	A124A	48.6463	8.494	0.795	Enzkloesterle - Germany	2016-02-23T12:00:00		DE	Underground shelter	cement	STS-2	120	EarthData_PR-24	100	KIT	KIT	offline	BGR	yes+PQLX
Z3	A125A	48.9742	8.6836	0.315	Neulingen - Germany	2016-04-18T00:00:00		DE	Building	cement	STS-2	120	EarthData_PR-24	100	KIT	KIT	offline	BGR	yes+PQLX
Z3	A126A	48.9894	8.4922	0.188	Durlach - Germany	2015-07-01T00:00:00		DE	Free field	cement	CMG-ESP	30	EarthData_PR-24	100	KIT	KIT	offline	BGR	yes+PQLX
Z3	A127A	49.1966	7.9782	0.488	Trifels - Germany	2015-10-15T18:00:00		DE	Building	cement	STS-2	120	EarthData_PR-24	100	KIT	KIT	offline	BGR	yes+PQLX
Z3	A128A	49.3986	8.5963	0.102	Planckstadt - Germany	2015-10-15T18:00:00		DE	Building	cement	STS-2	120	EarthData_PR-24	100	KIT	KIT	offline	BGR	yes+PQLX
Z3	A129A	49.3427	7.7418	0.368	Schmalenberg - Germany	2016-02-29T19:00:00		DE	Underground shelter	cement	STS-2	120	EarthData_PR-24	100	KIT	KIT	offline	BGR	yes+PQLX
Z3	A140A	47.5523	11.4361	0.79	Vorderriss	2016-01-18T10:00:00		DE	Building	cement	CMG-3T	120	CMG_DM24_MK2	100	U Kiel	U Kiel	offline	BGR	yes+PQLX
Z3	A141A	47.7528	11.849	0.839	Hausham	2016-01-20T10:00:00		DE	Building	cement	CMG-3T	120	CMG_DM24_MK2	100	U Kiel	U Kiel	offline	BGR	yes+PQLX
BW	MGS04	47.9797	11.7188	0.624	Faistenhaar	2016-01-21T12:00:00		DE	Building	cement	CMG-3T	120	Centaur	100	U Kiel	U Kiel	online	LMU	yes+PQLX	original name Z3.A142A
Z3	A143A	47.6836	11.0032	0.85	Bad Bayersoien	2016-01-18T10:00:00		DE	Building	cement	CMG-3T	120	CMG_DM24_MK2	100	U Kiel	U Kiel	offline	BGR	yes+PQLX
Z3	A144A	48.0979	12.0838	0.553	Forsting	2016-01-21T10:00:00		DE	Building	cement	STS-2	120	EarthData_EDL	100	KIT	U Kiel	offline	BGR	yes+PQLX
Z3	A145A	47.8673	12.396	0.537	Herrenchiemsee	2016-01-19T10:36:00		DE	Building	cement	CMG-3T	120	CMG_DM24_MK2	100	U Kiel	U Kiel	offline	BGR	yes+PQLX
Z3	A146A	48.2928	12.975	0.464	Eggstetten	2016-01-18T10:37:00		DE	Building	cement	CMG-3T	120	CMG_DM24_MK2	100	U Kiel	U Kiel	offline	BGR	yes+PQLX
Z3	A147A	48.5379	12.9455	0.389	Johanniskirchen	2016-01-19T10:36:00	2016-07-28T06:45:00	DE	Building	cement	CMG-3T	120	CMG_DM24_MK2	100	U Kiel	U Kiel	closed	BGR	yes+PQLX
Z3	A147B	48.53	12.9776	0.428	Fabach - Johanniskirchen	2016-07-25T09:30:00		DE	Building	cement	CMG-3T	120	CMG_DM24_MK2	100	U Kiel	U Kiel	offline	BGR	yes+PQLX
Z3	A148A	48.478	12.4605	0.492	Johannesbrunn	2016-01-18T13:58:00	2016-11-22T08:05:00	DE	Building	cement	CMG-3T	120	CMG_DM24_MK2	100	U Kiel	U Kiel	closed	BGR	yes+PQLX
Z3	A148B	48.5086	12.4767	0.485	Wimm - Aham	2016-07-28T13:20:00		DE	Building	cement	CMG-3T	120	CMG_DM24_MK2	100	U Kiel	U Kiel	offline	BGR	yes+PQLX
Z3	A151A	48.882	6.37985	0.214	Ferme du Milberg	2017-06-07T12:00:00		FR	Free field	cement	Trillium_120QA	120	Centaur	100	SISMOB	EOST	offline	RESIF	yes+PQLX
Z3	A152A	48.7248	6.85392	0.279	Delme - Piscine des Allemands	2017-06-08T13:00:00		FR	Free field	cement	Trillium_120QA	120	Centaur	100	SISMOB	EOST	offline	RESIF	yes+PQLX
Z3	A153A	48.318	4.7968	0.238	-	2017-06-15T15:00:00		FR	Free field	cement	Trillium_120QA	120	Centaur	100	SISMOB	EOST	offline	RESIF	yes+PQLX
Z3	A154A	48.4417	5.51523	0.352	-	2017-06-16T13:00:00		FR	Free field	cement	Trillium_120QA	120	Centaur	100	SISMOB	EOST	online	RESIF	yes+PQLX
Z3	A155A	48.4312	6.08404	0.501	Cave couvent - 54330 Saxon-Sion	2017-07-06T12:00:00		FR	Building	cement	Trillium_120QA	120	Centaur	100	SISMOB	EOST	online	RESIF	yes+PQLX
Z3	A156A	47.9467	4.5341	0.38	Charrey-sur-Seine - 21	2016-11-23T14:48:00		FR	Free field	cement	STS-2	120	Taurus	100	SISMOB	EOST	online	RESIF	yes+PQLX
Z3	A157A	48.0225	5.73258	0.444	Serqueux - 52	2016-08-03T19:00:00		FR	Free field	cement	CMG-40	30	Taurus	100	SISMOB	EOST	online	RESIF	yes+PQLX
Z3	A158A	48.0068	6.35006	0.567	Haudompré - 88	2015-11-23T13:00:00		FR	Underground shelter	cement	STS-2	120	Taurus	100	SISMOB	EOST	online	RESIF	yes+PQLX
Z3	A159A	47.6439	4.31789	0.366	St Remy 21500	2017-06-01T14:00:00		FR	Free field	cement	Trillium_120QA	120	Centaur	100	SISMOB	EOST	online	RESIF	yes+PQLX
Z3	A160A	47.6908	5.0502	0.465	Grancey le château neuvelle - 21	2016-08-03T15:00:00		FR	Free field	cement	CMG-40	30	Taurus	100	SISMOB	EOST	online	RESIF	yes+PQLX
Z3	A161A	47.5835	6.0108	0.272	Raze - 70	2017-02-23T13:00:00		FR	Building	cement	Trillium_120QA	120	Centaur	100	SISMOB	EOST	online	RESIF	yes+PQLX	until 2017-05-16T07:30:00 sensor was Trillium_120P and digitizer was Taurus
Z3	A162A	47.3055	4.57935	0.567	Martrois	2017-06-23T11:00:00		FR	Free field	cement	Trillium_120QA	120	Centaur	100	SISMOB	EOST	online	RESIF	yes+PQLX
Z3	A163A	47.197	5.20102	0.222	Tart le Haut - 21	2016-07-13T14:00:00		FR	Free field	cement	CMG-40	30	Taurus	100	SISMOB	EOST	online	RESIF	yes+PQLX	wrong configuration from 2016.06.14 to start date
Z3	A164A	47.1015	5.81037	0.272	Fourg - 25	2016-06-10T17:00:00		FR	Building	cement	STS-2	120	Taurus	100	SISMOB	EOST	online	RESIF	yes+PQLX
Z3	A165A	46.9102	3.4984	0.271	Le Bourg Thianges - 58	2017-03-10T12:00:00		FR	Building	cement	Trillium_120QA	120	Centaur	100	SISMOB	EOST	online	RESIF	yes+PQLX	until 2017-05-15T12:15:00 sensor was Trillium_120P and digitizer was Taurus
Z3	A166A	46.9816	4.14798	0.58	La Thibaudine - 71	2016-11-24T14:00:00		FR	Free field	cement	STS-2	120	Taurus	100	SISMOB	EOST	online	RESIF	yes+PQLX
Z3	A167A	46.7469	5.31951	0.203	Sens-sur-Seille - 71	2016-10-20T00:00:00		FR	Free field	cement	STS-2	120	Taurus	100	SISMOB	EOST	online	RESIF	yes+PQLX
Z3	A168A	46.5604	3.9329	0.125	Neuvy-Grandchamp - 71	2016-12-08T16:31:00		FR	Building	cement	Trillium_120QA	120	Centaur	100	SISMOB	OSUG	online	RESIF	yes+PQLX	until 2017-05-30T07:30:00 sensor was Trillium_120P and digitizer was Taurus
Z3	A169A	46.5963	4.58183	0.3	Burzy - 71	2017-02-17T12:00:00		FR	Building	cement	CMG-40	30	Taurus	100	SISMOB	EOST	online	RESIF	yes+PQLX
Z3	A170A	46.3781	3.4474	0.14	Saint-Gerand-de-Vaux - 03	2016-12-09T13:00:00		FR	Building	cement	Trillium_120QA	120	Centaur	100	SISMOB	OSUG	online	RESIF	yes+PQLX	until 2017-05-29T14:50:00 sensor was Trillium_120P and digitizer was Taurus
Z3	A171A	46.2008	4.1125	0.378	Fleury-la-Montagne - 71	2016-10-11T17:10:00		FR	Free field	cement	STS-2	120	Q330S	100	SISMOB	OSUG	online	RESIF	yes+PQLX
Z3	A172A	46.3858	5.2132	0.273	Foissiat - 01	2016-10-20T00:00:00		FR	Free field	cement	CMG-40	30	Taurus	100	SISMOB	EOST	online	RESIF	yes+PQLX
Z3	A173A	46.3296	6.6808	1.03	Vacheresse - 74	2016-06-24T14:00:00		FR	Free field	cement	STS-2	120	Taurus	100	SISMOB	OSUG	online	RESIF	yes+PQLX
Z3	A174A	45.9926	4.4619	0.625	Saint-Just-d'Avray - 69	2016-10-27T09:52:00		FR	Building	cement	Trillium_Compact	120	Taurus	100	SISMOB	OSUG	online	RESIF	yes+PQLX
Z3	A175A	45.9427	5.0747	0.315	Le Montellier - 01	2016-06-13T15:25:00		FR	Building	cement	CMG-3ESPC	60	Centaur	100	SISMOB	OSUG	online	RESIF	yes+PQLX	until 2017-05-29T08:00:00 digitizer was Taurus
Z3	A176A	45.7178	4.0666	0.41	Montverdun - 42	2016-10-25T15:50:00		FR	Building	cement	CMG-3ESP	90	Taurus	100	SISMOB	OSUG	online	RESIF	yes+PQLX
Z3	A177A	45.5963	4.6086	0.52	Saint-Didier-sous-Riviere - 69	2016-12-20T11:00:00		FR	Building	cement	Trillium_Compact	120	Taurus	100	SISMOB	OSUG	online	RESIF	yes+PQLX
Z3	A178A	45.8107	6.2004	0.66	Lathuile - 74	2016-09-09T17:30:00		FR	Free field	cement	CMG-3ESP	90	Taurus	100	SISMOB	OSUG	online	RESIF	yes+PQLX
Z3	A179A	45.4723	2.9722	1.084	Besse-et-Saint-Anastasie - 63	2017-02-01T15:55:55		FR	Building	cement	Trillium_120QA	120	Centaur	100	SISMOB	OSUG	online	RESIF	yes+PQLX	until 2017-05-16T12:10:00 sensor was Trillium_120P and digitizer was Taurus
Z3	A180A	45.3113	4.0427	0.845	Chateau de Valprivas - 43	2016-08-30T16:00:00		FR	Building	cement	STS-2	120	Taurus	100	SISMOB	OSUG	online	RESIF	yes+PQLX
Z3	A181A	45.3805	6.302	1.305	Hameau du Preney - 73	2016-12-12T13:50:00		FR	Building	cement	Trillium_Compact	120	Taurus	100	SISMOB	OSUG	online	RESIF	yes+PQLX
Z3	A182A	44.9695	2.8069	0.88	Brezons - 15	2017-02-02T11:00:00		FR	Building	cement	Trillium_120QA	120	Centaur	100	SISMOB	OSUG	online	RESIF	yes+PQLX	until 2017-05-17T08:00:00 sensor was Trillium_120P and digitizer was Taurus
Z3	A183A	45.0107	3.663	1.107	Saint-Privet-d'Allier - 43	2017-03-30T13:00:00		FR	Building	cement	Trillium_120QA	120	Centaur	100	SISMOB	OSUG	online	RESIF	yes+PQLX	until 2017-05-17T15:10:00 sensor was STS-2 and digitizer was Q330S
Z3	A184A	44.892	4.4516	0.75	Saint Michel d'Aurance - 07	2016-06-09T12:50:00		FR	Building	cement	STS-2	120	Taurus	100	SISMOB	OSUG	online	RESIF	yes+PQLX
Z3	A185A	45.1209	5.0728	0.42	Peyrins - 26	2016-03-17T15:30:00		FR	Building	cement	Trillium_Compact	120	Taurus	100	SISMOB	OSUG	online	RESIF	yes+PQLX
Z3	A186A	44.7932	5.5891	0.978	Chichilianne - 38	2016-04-20T16:00:00	2017-01-27T00:00:00	FR	Free field	cement	STS-2	120	Taurus	100	SISMOB	OSUG	closed	RESIF	yes+PQLX	sensor CMG_3ESP (90s) from 2016-11-03T14:25:00
Z3	A186B	44.793	5.5892	0.978	Chichilianne - 38	2017-03-01T12:45:00		FR	Building	cement	STS-2	120	Q330S	100	SISMOB	OSUG	online	RESIF	yes+PQLX
Z3	A187A	44.7343	3.3398	0.935	Rimeize - 48	2017-04-27T10:00:00		FR	Building	cement	Trillium_120QA	120	Centaur	100	SISMOB	OSUG	online	RESIF	yes+PQLX
Z3	A188A	44.6001	3.9367	1.085	Saint Laurent les bains -07	2016-06-08T15:30:00		FR	Building	cement	STS-2	120	Taurus	100	SISMOB	OSUG	online	RESIF	yes+PQLX
Z3	A190A	44.3246	2.8695	0.94	Segur - 12	2017-04-26T12:14:00		FR	Building	cement	Trillium_120QA	120	Centaur	100	SISMOB	OSUG	online	RESIF	yes+PQLX
Z3	A191A	44.3193	3.5378	0.95	Montbrun - 48	2017-04-26T11:50:00		FR	Free field	cement	Trillium_120QA	120	Centaur	100	SISMOB	OSUG	online	RESIF	yes+PQLX
Z3	A192A	44.5069	4.5869	0.249	Valvignères -07	2016-04-07T15:07:00		FR	Free field	cement	Trillium_Compact	120	Taurus	100	SISMOB	OSUG	online	RESIF	yes+PQLX	until 2017-03-24T08:00:00 sensor was STS-2
Z3	A193A	44.3711	5.14762	0.39	Nyons - 26	2016-01-27T16:00:00		FR	Free field	cement	STS-2	120	Taurus	100	SISMOB	OSUG	online	RESIF	yes+PQLX
Z3	A194A	44.3933	6.5023	1.255	Méolans Revel - 04	2016-08-04T14:38:00		FR	Free field	cement	STS-2	120	Taurus	100	SISMOB	OSUG	online	RESIF	yes+PQLX
Z3	A195A	43.9752	2.7193	0.29	St Izaire - 12	2017-04-25T15:28:00		FR	Building	cement	Trillium_120QA	120	Centaur	100	SISMOB	OSUG	online	RESIF	yes+PQLX
Z3	A196A	44.0515	4.528	0.259	La Capelle-et-Masmolene - 30	2017-03-01T16:15:00		FR	Free field	cement	CMG-3ESP	90	Taurus	100	SISMOB	OCA	online	RESIF	yes+PQLX
Z3	A198A	43.6006	2.8004	0.72	Fraisse sur Agout - 34	2017-04-25T15:20:00		FR	Building	cement	Trillium_120QA	120	Centaur	100	SISMOB	OSUG	online	RESIF	yes+PQLX
Z3	A199A	43.7438	3.6883	0.341	Bergerie de la Roque - 34	2016-08-26T11:00:00		FR	Urban free field	cement	CMG-3ESP	90	Taurus	100	SISMOB	OCA	online	RESIF	yes+PQLX
Z3	A200A	43.6927	4.1885	0.061	Mas Saint Remy - 30	2016-08-26T17:00:00		FR	Free field	cement	CMG-40	30	Centaur	100	SISMOB	OCA	online	RESIF	yes+PQLX	until 2017-07-12T08:00:00 digitizer was Taurus
Z3	A201A	43.5006	4.7917	0.005	Arles - 13	2016-04-07T00:00:00		FR	Building	cement	CMG-3ESP	120	Taurus	100	SISMOB	OCA	online	RESIF	yes+PQLX
Z3	A202A	43.5025	3.2602	0.212	Domaine de Cadables - 34	2016-08-26T00:00:00		FR	Free field	cement	CMG-40	30	Taurus	100	SISMOB	OCA	online	RESIF	yes+PQLX
Z3	A204A	43.2413	5.6099	0.512	Roquefort la Bedoule - 13	2016-06-14T00:00:00		FR	Building	cement	CMG-3ESP	90	Taurus	100	SISMOB	OCA	online	RESIF	yes+PQLX
Z3	A205A	43.2001	6.2335	0.384	La londe les maures - 83	2016-06-07T10:47:00		FR	Free field	cement	STS-2	120	Taurus	100	SISMOB	OCA	online	RESIF	yes+PQLX
Z3	A206A	43.2197	6.601	0.363	Gassin - 83	2016-02-17T00:00:00		FR	Free field	cement	STS-2	120	Taurus	100	SISMOB	OCA	online	RESIF	yes+PQLX
Z3	A208A	42.2326	8.7937	0.83	Marignana - 2A	2016-09-15T13:30:00		FR	Free field	cement	CMG-3ESP	90	Taurus	100	SISMOB	OCA	online	RESIF	yes+PQLX
Z3	A209A	42.5041	9.4944	0.02	Venzolasca - 2B	2016-09-15T19:00:00	2017-01-24T12:00:00	FR	Other: Aqueduct	cement	CMG-3ESP	90	Taurus	100	SISMOB	OCA	closed	RESIF	yes+PQLX
Z3	A209B	42.5029	9.5066	0.007	Citrinche - Commune de Venzolasca (2B)	2017-05-17T12:00:00		FR	Free field	cement	Trillium_120QA	120	Centaur	100	SISMOB	OCA	online	RESIF	yes+PQLX
Z3	A210A	48.8277	5.92254	0.273	Manonville - 54	2016-05-19T10:00:00		FR	Free field	cement	STS-2	120	Taurus	100	SISMOB	EOST	offline	RESIF	yes+PQLX
Z3	A211A	48.4071	6.61952	0.279	Xaffevillers - 88	2016-05-19T15:00:00		FR	Free field	cement	STS-2	120	Taurus	100	SISMOB	EOST	online	RESIF	yes+PQLX
Z3	A212A	48.0931	5.0444	0.358	Semoutiers-Montason - 52	2016-11-24T13:00:00		FR	Free field	cement	CMG-40	30	Taurus	100	SISMOB	EOST	online	RESIF	yes+PQLX
Z3	A213A	47.4967	5.4799	0.282	Autrey-Les-Gray - 70	2016-04-01T13:00:00		FR	Free field	cement	STS-2	120	Taurus	100	SISMOB	EOST	online	RESIF	yes+PQLX
Z3	A214A	46.362	5.8003	0.476	Chassal - 39	2016-07-21T16:00:00		FR	Cave	rock	STS-2	120	Taurus	100	SISMOB	EOST	online	RESIF	yes+PQLX
Z3	A215A	45.4307	5.23226	0.45	Commelles - 38	2015-12-07T16:00:00		FR	Building	cement	Trillium_Compact	120	Taurus	100	SISMOB	OSUG	online	RESIF	yes+PQLX
Z3	A216A	44.4291	5.54989	1.245	Montmorin - 05	2016-02-17T13:00:00		FR	Free field	cement	STS-2	120	Taurus	100	SISMOB	OSUG	online	RESIF	yes+PQLX
Z3	A217A	44.3701	6.0733	1.087	Le Caire - 04	2016-08-03T17:30:00		FR	Free field	cement	STS-2	120	Taurus	100	SISMOB	OSUG	online	RESIF	yes+PQLX
Z3	A250A	45.084	14.9106	0.686	Rusevo Krmpotsko - Croatia	2015-11-29T14:30:00		HR	Building	cement	STS-2	120	Taurus	100	ETHZ	ETHZ	online	ETH	yes+PQLX
Z3	A251A	45.1286	16.2664	0.252	Rujevac - Croatia	2015-11-30T12:30:00		HR	Building	cement	STS-2	120	Taurus	100	ETHZ	ETHZ	online	ETH	yes+PQLX
Z3	A252A	45.4356	17.8482	0.412	Venje - Croatia	2015-11-27T14:30:00		HR	Building	cement	STS-2	120	Taurus	100	ETHZ	ETHZ	online	ETH	yes+PQLX
Z3	A253A	45.2926	13.8167	0.408	Karojba - Istria - Croatia	2016-06-06T16:00:00		HR	Building	tiles	STS-2	120	Taurus	100	ETHZ	ETHZ	online	ETH	yes+PQLX
Z3	A254A	45.3148	15.805	0.543	Petrova Gora - Croatia	2016-06-07T13:30:00		HR	Building	cement	STS-2	120	Taurus	100	ETHZ	ETHZ	online	ETH	yes+PQLX
Z3	A255A	45.509	16.0507	0.224	Hotnja - Vukomericke Gorice - Croatia	2016-06-07T18:00:00		HR	Building	cement	STS-2	120	Taurus	100	ETHZ	ETHZ	online	ETH	yes+PQLX
Z3	A260A	47.2834	16.7056	0.243	Vassurany - Hungary	2016-01-26T13:00:00		HU	Urban free field	cement	CMG-3T	120	CMG_DM24_S3EAM	100	GGI-HAS	KRSZO	online	ORFEUS	yes+ObsPy
Z3	A261A	46.952	17.1486	0.171	Ohid - Hungary	2016-01-26T15:00:00		HU	Urban free field	cement	CMG-3T	120	CMG_DM24_S3EAM	100	GGI-HAS	KRSZO	online	ORFEUS	yes+ObsPy
Z3	A262A	46.8642	16.5276	0.24	Szaknyer - Hungary	2016-01-27T10:00:00		HU	Urban free field	cement	CMG-3T	120	CMG_DM24_S3EAM	100	GGI-HAS	KRSZO	online	ORFEUS	yes+ObsPy
Z3	A263A	46.6408	17.3149	0.165	Hollad - Hungary	2015-12-15T13:00:00		HU	Urban free field	tiles	CMG-3T	120	CMG_DM24_S3EAM	100	GGI-HAS	KRSZO	online	ORFEUS	yes+ObsPy
Z3	A264A	46.1597	17.2897	0.143	Tarany - Hungary	2016-01-27T13:00:00		HU	Urban free field	cement	CMG-3T	120	CMG_DM24_S3EAM	100	GGI-HAS	KRSZO	online	ORFEUS	yes+ObsPy
Z3	A265A	46.4245	17.7954	0.151	Kaposfured - Hungary	2015-12-15T10:00:00		HU	Urban free field	tiles	CMG-3T	120	CMG_DM24_S3EAM	100	GGI-HAS	KRSZO	online	ORFEUS	yes+ObsPy
Z3	A266A	46.5256	18.2647	0.219	Gyulaj - Hungary	2015-12-03T11:00:00		HU	Urban free field	cement	CMG-3T	120	CMG_DM24_S3EAM	100	GGI-HAS	KRSZO	online	ORFEUS	yes+ObsPy
Z3	A267A	46.9463	18.482	0.116	Kaloz - Hungary	2015-12-03T15:00:00		HU	Urban free field	tiles	CMG-3T	120	CMG_DM24_S3EAM	100	GGI-HAS	KRSZO	online	ORFEUS	yes+ObsPy
Z3	A268A	47.4313	17.9238	0.201	Rede - Hungary	2016-02-02T14:00:00		HU	Urban free field	tiles	CMG-3T	120	CMG_DM24_S3EAM	100	GGI-HAS	KRSZO	online	ORFEUS	yes+ObsPy
Z3	A269A	47.6386	18.3824	0.195	Baj - Hungary	2015-12-09T10:00:00		HU	Urban free field	tiles	CMG-3T	120	CMG_DM24_S3EAM	100	GGI-HAS	KRSZO	online	ORFEUS	yes+ObsPy
Z3	A270A	47.8452	19.0186	0.152	Szokolya - Hungary	2016-07-06T12:00:00		HU	Urban free field	tiles	CMG-3T	120	CMG_DM24_S3EAM	100	GGI-HAS	KRSZO	online	ORFEUS	yes+ObsPy
Z3	A271A	47.1547	18.8341	0.17	Ivancsa - Hungary	2016-01-13T11:30:00		HU	Urban free field	tiles	Trillium_Compact	120	Taurus	100	ETHZ	ETHZ	online	ETH	yes+PQLX
Z3	A272A	46.7444	18.9654	0.412	Bolcske - Hungary	2016-01-13T15:00:00		HU	Building	tiles	Trillium_Compact	120	Taurus	100	ETHZ	ETHZ	online	ETH	yes+PQLX
Z3	A273A	45.9163	17.8161	0.1	Marocsa - Hungary	2016-03-02T13:00:00		HU	Building	tiles	Trillium_Compact	120	Taurus	100	ETHZ	ETHZ	online	ETH	yes+PQLX
Z3	A280A	44.5391	7.9089	0.288	Farigliano - Viaiano - Italy	2015-09-15T16:50:00		IT	Urban free field	cement	STS-2	120	Taurus	100	ETHZ	ETHZ	online	ETH	yes+PQLX
Z3	A281A	44.8534	7.7099	0.292	Carmagnola - Italy	2015-09-16T00:00:00		IT	Urban free field	cement	STS-2	120	Taurus	100	ETHZ	ETHZ	online	ETH	yes+PQLX
Z3	A282A	45.2545	7.6133	0.428	San Carlo Canavese - Italy	2015-09-16T17:00:00		IT	Urban free field	tiles	STS-2	120	Taurus	100	ETHZ	ETHZ	online	ETH	yes+PQLX
Z3	A283A	45.2296	8.3208	0.185	Tricerro - Italy	2015-09-17T12:00:00	2016-03-17T09:00:00	IT	Urban free field	cement	STS-2	120	Taurus	100	ETHZ	ETHZ	closed	ETH	yes+PQLX
Z3	A283B	45.238	8.2885	0.195	Tricerro - Italy	2016-03-17T16:00:00		IT	Building	cement	STS-2	120	Taurus	100	ETHZ	ETHZ	online	ETH	yes+PQLX
Z3	A284A	45.1371	9.3837	0.099	Costa De Nobili - Padulino - Italy	2015-09-20T18:00:00		IT	Urban free field	cement	STS-2	120	Taurus	100	ETHZ	ETHZ	online	ETH	yes+PQLX
Z3	A285A	44.8939	9.9098	0.152	Lusurasco - Italy	2015-09-16T17:00:00		IT	Urban free field	tiles	STS-2	120	Taurus	100	ETHZ	ETHZ	online	ETH	yes+PQLX
Z3	A286A	45.366	8.8338	0.17	Villa Reale - Cassolnovo - Italy	2015-09-07T16:00:00		IT	Urban free field	cement	STS-2	120	Taurus	100	ETHZ	ETHZ	online	ETH	yes+PQLX
Z3	A287A	45.6225	8.361	0.423	Gattinara - La Torre - Italy	2015-09-07T16:00:00		IT	Urban free field	cement	STS-2	120	Taurus	100	ETHZ	ETHZ	online	ETH	yes+PQLX
Z3	A288A	46.0082	8.4818	1.306	Verbania - Casa dell'Alpino - Cicogna - Italy	2015-09-06T16:00:00		IT	Free field	cement	STS-2	120	Taurus	100	ETHZ	ETHZ	online	ETH	yes+PQLX
Z3	A289A	46.0473	9.761	1.78	Bergamo - Funivia il Toro - Foppolo - Italy	2015-09-09T16:00:00		IT	Building	cement	STS-2	120	Taurus	100	ETHZ	ETHZ	online	ETH	yes+PQLX
Z3	A290A	46.5068	10.928	1.729	Bolzano - San Nicolo - Ultimo -Italy	2015-11-12T18:30:00		IT	Building	cement	STS-2	120	Taurus	100	ETHZ	ETHZ	online	ETH	yes+PQLX
Z3	A291A	46.6246	11.8805	1.568	Badia - Italy	2015-09-22T17:00:00		IT	Building	cement	STS-2	120	Taurus	100	ETHZ	ETHZ	online	ETH	yes+PQLX
Z3	A300A	45.8193	13.128	0.006	Muzzana del Turgnano (UD) - Italy	2015-10-28T09:00:00		IT	Building	cement	Trillium_120C	120	Reftek_130	100	INGV	INGV	online	INGV	yes+ObsPy
Z3	A301A	45.6198	12.621	0.002	Isiata (VE) - Italy	2015-10-29T09:00:00		IT	Urban free field	cement	Trillium_120C	120	Reftek_130	100	INGV	INGV	online	INGV	yes+ObsPy
Z3	A302A	45.6335	11.9713	0.026	Resana (TV) - Italy	2015-10-30T09:00:00		IT	Building	cement	Trillium_120C	120	Reftek_130	100	INGV	INGV	online	INGV	yes+ObsPy
Z3	A303A	45.3443	12.3182	0.011	Lido-Pellestrina (VE) - Italy	2015-10-26T09:00:00		IT	Building	cement	STS-2	120	Reftek_130	100	INGV	INGV	online	INGV	yes+ObsPy
Z3	A304A	45.0017	12.0335	0.001	Bellombra - adraia (RO)	2016-02-05T12:00:00		IT	Building	tiles	Trillium_120C	120	Reftek_130S	100	INGV	INGV	online	INGV	yes+ObsPy
Z3	A305A	44.9592	12.4323	-0.003	Porto Tolle (RO) - Italy	2015-10-29T13:02:08		IT	Urban free field	cement	Trillium_120C	120	Reftek_130	100	INGV	INGV	online	INGV	yes+ObsPy
Z3	A306A	44.5359	10.5961	0.463	Viano (RE) - Italy	2015-11-04T11:49:48		IT	Building	cement	Trillium_120C	120	Reftek_130	100	INGV	INGV	online	INGV	yes+ObsPy
Z3	A307A	44.6608	11.4363	0.009	Bentivoglio (BO) - Italy	2015-11-05T10:41:48		IT	Urban free field	cement	Trillium_120C	120	Reftek_130	100	INGV	INGV	online	INGV	yes+ObsPy
Z3	A308A	44.5825	12.0057	-0.002	Longastrino (FE) - Italy	2015-11-03T11:34:41		IT	Urban free field	cement	Trillium_120C	120	Reftek_130	100	INGV	INGV	online	INGV	yes+ObsPy
Z3	A309A	44.1704	12.2445	0.032	Martorano (FC) - Italy	2015-10-28T12:44:33		IT	Urban free field	cement	Trillium_120C	120	Reftek_130	100	INGV	INGV	online	INGV	yes+ObsPy
Z3	A312A	45.1074	10.4817	0.03	Bozzolo (MN) - Italy	2015-12-30T12:00:00		IT	Other: Cellar	tiles	Trillium_120P	120	Reftek_130	100	INGV	INGV	online	INGV	yes+ObsPy
Z3	A313A	45.3135	10.6628	0.064	Volta Mantovana (MN) - Italy	2015-12-30T14:00:00		IT	Urban free field	cement	Trillium_120P	120	Reftek_130	100	INGV	INGV	online	INGV	yes+ObsPy
Z3	A316A	42.3337	10.2957	0.038	Montecristo (LI) - Italy	2015-11-03T12:00:30		IT	Underground shelter	bedrock	Trillium_120C	120	Reftek_130	100	INGV	INGV	offline	INGV	yes+ObsPy	real-time unlikely -- uninhabited island
Z3	A317A	43.05	9.84244	0.035	Capraia	2015-12-15T16:00:00		IT	Building	cement	Trillium_120C	120	Reftek_130-01	100	INGV	INGV	online	INGV	yes+ObsPy
Z3	A318A	43.121	10.5732	0.173	Donoratico (LI) - Italy	2015-11-17T10:32:52		IT	Free field	bedrock	Trillium_120C	120	Reftek_130	100	INGV	INGV	online	INGV	yes+ObsPy
Z3	A319A	43.4764	10.5787	0.343	Santaluce	2015-12-11T12:06:34		IT	Free field	bedrock	Trillium_120C	120	Reftek_130S	100	INGV	INGV	online	INGV	yes+ObsPy
Z3	A331A	49.1501	18.2209	0.427	Zubak	2015-08-25T00:00:00		SK	Building	cement	Reftek151_60	60	Reftek_130S	100	U Vienna	U Vienna	online	ORFEUS	yes+ObsPy	also streaming 1sps
Z3	A332A	48.8045	18.4645	0.359	Rudnianska lehota	2015-09-08T00:00:00		SK	Building	tiles	Reftek151_60	60	Reftek_130S	100	U Vienna	U Vienna	online	ORFEUS	yes+ObsPy	also streaming 1sps
Z3	A333A	48.7156	17.1041	0.177	Gbely	2015-09-17T00:00:00		SK	Building	tiles	Reftek151_60	60	Reftek_130	100	U Vienna	U Vienna	online	ORFEUS	yes+ObsPy	also streaming 1sps
Z3	A334A	48.6044	17.6747	0.224	Sterusy	2015-09-16T00:00:00		SK	Urban free field	tiles	Reftek151_60	60	Reftek_130	100	U Vienna	U Vienna	online	ORFEUS	yes+ObsPy	also streaming 1sps
Z3	A335A	48.4469	18.3359	0.32	Lovce	2015-08-13T00:00:00		SK	Building	cement	Reftek151_60	60	Reftek_130S	100	U Vienna	U Vienna	online	ORFEUS	yes+ObsPy	also streaming 1sps
Z3	A336A	48.2333	18.999	0.183	Medovarce	2015-08-14T00:00:00		SK	Cave	bedrock	Reftek151_60	60	Reftek_130S	100	U Vienna	U Vienna	online	ORFEUS	yes+ObsPy	also streaming 1sps
Z3	A337A	48.2443	17.7898	0.117	Vahovce	2015-08-19T00:00:00		SK	Building	cement	Reftek151_60	60	Reftek_130	100	U Vienna	U Vienna	online	ORFEUS	yes+ObsPy	also streaming 1sps
Z3	A338A	48.0152	18.3525	0.154	Semerovo	2015-09-03T00:00:00		SK	Building	cement	Reftek151_60	60	Reftek_130S	100	U Vienna	U Vienna	online	ORFEUS	yes+ObsPy	also streaming 1sps
Z3	A339A	47.8294	17.6559	0.11	Balon	2015-09-02T00:00:00		SK	Building	tiles	Reftek151_60	60	Reftek_130S	100	U Vienna	U Vienna	online	ORFEUS	yes+ObsPy	also streaming 1sps
Z3	A350A	50.1674	11.5708	0.489	Guttenberg	2015-12-17T00:00:00		DE	Building	cement	CMG-ESPC	60	Q730	100	U Leipzig	U Leipzig	online	GFZ	yes+PQLX
Z3	A351A	50.003	10.7922	0.284	Priegendorf	2015-12-10T09:30:00	2016-06-02T12:30:00	DE	Building	cement	CMG-ESPC	60	Q730	100	U Leipzig	U Leipzig	closed	GFZ	yes+PQLX
Z3	A351B	50.0019	10.7612	0.339	Rudendorf	2016-06-02T15:00:00		DE	Underground shelter	tiles	CMG-ESPC	60	Q730	100	U Leipzig	U Leipzig	online	GFZ	yes+PQLX
Z3	A352A	49.8214	11.6903	0.452	Bieberswoehr	2015-12-17T00:00:00		DE	Building	cement	CMG-ESPC	60	Q730	100	U Leipzig	U Leipzig	online	GFZ	yes+PQLX
Z3	A353A	49.5178	10.5426	0.415	Eichelberg	2015-12-16T00:00:00		DE	Urban free field	cement	CMG-ESPC	60	EarthData	100	U Leipzig	U Leipzig	online	GFZ	yes+PQLX
Z3	A354A	49.4523	10.969	0.327	Zirndorf	2015-12-08T00:00:00		DE	Underground shelter	cement	CMG-ESPC	60	EarthData	100	U Leipzig	U Leipzig	online	GFZ	yes+PQLX
Z3	A355A	49.349	12.3832	0.385	Neunburg	2015-12-08T00:00:00		DE	Building	cement	Trillium_120PA	120	Taurus	100	U Muenster	U Leipzig	online	GFZ	yes+PQLX
Z3	A356A	49.0371	12.2138	0.398	Donaustauf	2015-12-09T00:00:00		DE	Underground shelter	tiles	Trillium_120PA	120	Taurus	100	U Muenster	U Leipzig	online	GFZ	yes+PQLX
Z3	A357A	48.6998	11.9992	0.426	Rottenburg	2015-11-14T00:00:00	2016-06-03T00:00:00	DE	Urban free field	tiles	Trillium_120PA	120	Taurus	100	U Muenster	U Leipzig	closed	GFZ	yes+PQLX
Z3	A357B	48.7026	11.9466	0.434	Oberlauterbach	2016-09-01T00:00:00		DE	Building	cement	Trillium_120PA	120	Taurus	100	U Muenster	U Leipzig	offline	GFZ	yes+PQLX
Z3	A358A	48.8697	13.1943	0.738	Raindorf	2015-12-04T00:00:00		DE	Urban free field	cement	Trillium_120PA	120	Taurus	100	U Muenster	U Leipzig	online	GFZ	yes+PQLX
Z3	A359A	48.8331	12.6421	0.333	Niederharthausen	2015-12-04T00:00:00	2017-04-26T16:00:00	DE	Urban free field	cement	Trillium_120PA	120	Taurus	100	U Muenster	U Leipzig	closed	GFZ	yes+PQLX
Z3	A359B	48.82	12.6772	0.333	Strasskirchen	2017-04-27T07:30:00		DE	Urban free field	cement	Trillium_120PA	120	Taurus	100	U Muenster	U Leipzig	online	GFZ	yes+PQLX
Z3	A360A	48.7289	10.2971	0.635	Altes Rathaus Auernheim	2015-12-09T16:00:00		DE	Building	cement	Trillium_120PA	120	Taurus	100	U Muenster	U Muenster	offline	BGR	yes+PQLX
Z3	A361A	48.7909	10.8171	0.5	Wasserturm Kaisheim	2016-02-02T16:00:00		DE	Building	cement	Trillium_120PA	120	Taurus	100	U Muenster	U Muenster	offline	BGR	yes+PQLX
Z3	A362A	48.3636	10.4021	0.588	Friedhof Schoenenfeld / Jettingen-Scheppach	2016-02-02T16:00:00		DE	Building	cement	Trillium_120PA	120	Taurus	100	U Muenster	U Muenster	offline	BGR	yes+PQLX
Z3	A363A	48.523	10.9333	0.537	Solarpark Todtenweis	2015-12-09T16:00:00		DE	Free field	tiles	Trillium_120PA	120	Taurus	100	U Muenster	U Muenster	offline	BGR	yes+PQLX
Z3	A364A	48.5019	11.4534	0.525	Kloster Scheyern	2015-12-08T16:00:00		DE	Building	cement	Trillium_120PA	120	Taurus	100	U Muenster	U Muenster	offline	BGR	yes+PQLX
Z3	A365A	48.1651	10.7334	0.594	Wasserwerk Schwabmuenchen	2015-12-09T16:00:00		DE	Building	cement	Trillium_120PA	120	Taurus	100	U Muenster	U Muenster	offline	BGR	yes+PQLX
Z3	A366A	47.8333	10.6234	0.794	Wasserwerk Hochbehaelter Kaufbeuren	2016-02-03T16:00:00		DE	Building	cement	Trillium_120PA	120	Taurus	100	U Muenster	U Muenster	offline	BGR	yes+PQLX
Z3	A367A	48.3067	11.9233	0.5	Bundeswehrkaserne Erding	2016-02-03T16:00:00		DE	Building	cement	Trillium_120PA	120	Taurus	100	U Muenster	U Muenster	offline	BGR	yes+PQLX
Z3	A368A	49.1259	10.5467	0.529	Natogelaende Bechhofen	2016-02-01T16:00:00		DE	Urban free field	cement	Trillium_120PA	120	Taurus	100	U Muenster	U Muenster	offline	BGR	yes+PQLX
Z3	A369A	49.116	11.0216	0.486	Schloss Sandsee - Pleinfeld	2016-02-01T16:00:00		DE	Building	bedrock	Trillium_120PA	120	Taurus	100	U Muenster	U Muenster	offline	BGR	yes+PQLX
Z3	A401A	42.6473	5.0203	-1.613	Ligurian Sea	2017-06-21T07:43:09	2018-02-16T00:01:00	FR	Other	sea bottom	OBS_Trillium_240	240	CS5321-22	62.5	IPGP	IPGP	offline
Z3	A402A	42.8793	5.3005	-1.632	Ligurian Sea	2017-06-20T07:31:00	2018-02-16T02:29:00	FR	Other	sea bottom	OBS_Trillium_Compact	120	6D6	250	Geomar	Geomar	offline
Z3	A404A	42.1782	5.0193	-2.013	Ligurian Sea	2017-06-20T02:46:00	2018-02-15T18:29:00	FR	Other	sea bottom	OBS_Trillium_Compact	120	6D6	250	Geomar	Geomar	offline
Z3	A405A	42.4116	5.3036	-2.192	Ligurian Sea	2017-06-16T02:19:00	2018-02-15T21:34:00	FR	Other	sea bottom	OBS_Trillium_Compact	120	6D6	250	AWI	Geomar	offline
Z3	A406A	42.618	5.5885	-2.399	Ligurian Sea	2017-06-22T18:01:00	see notes	FR	Other	sea bottom	OBS_Trillium_Compact	120	6D6	250	Geomar	Geomar	offline			released but not yet found
Z3	A408A	43.1134	6.9637	-2.249	Ligurian Sea	2017-06-18T07:09:00	see notes	FR	Other	sea bottom	OBS_Trillium_Compact	120	6D6	250	AWI	Geomar	offline			not released -- auto-release set for October 2018
Z3	A409A	43.3482	7.5167	-1.981	Ligurian Sea	2017-06-18T01:18:00	2018-02-17T09:40:00	FR	Other	sea bottom	OBS_Trillium_Compact	120	6D6	250	AWI	Geomar	offline
Z3	A410A	43.5882	8.0753	-2.423	Ligurian Sea	2017-04-25T00:00:00	2018-03-17T04:15:00	IT	Other	sea bottom	OBS_Trillium_Compact	120	non-standard_home-grown	100	OCA	OCA	offline
Z3	A411A	43.7004	8.6512	-2.55	Ligurian Sea	2017-06-19T08:36:00	2018-02-19T08:01:00	IT	Other	sea bottom	OBS_CMG-40	120	MTS	50	Geomar	Geomar	offline
Z3	A412A	41.6476	4.7448	-2.519	Ligurian Sea	2017-06-16T09:27:00	2018-02-12T08:42:00	FR	Other	sea bottom	OBS_Trillium_Compact	120	6D6	250	AWI	Geomar	offline
Z3	A413A	41.943	5.3035	-2.278	Ligurian Sea	2017-06-22T00:22:00	2018-02-15T15:41:00	FR	Other	sea bottom	OBS_Trillium_240	240	CS5321-22	62.5	IPGP	IPGP	offline
Z3	A414A	42.1783	5.8583	-2.463	Ligurian Sea	2017-06-15T14:53:00	2018-02-15T12:46:00	FR	Other	sea bottom	OBS_Trillium_Compact	120	6D6	250	Geomar	Geomar	offline
Z3	A415A	42.4119	6.4109	-2.595	Ligurian Sea	2017-06-15T18:00:00	2018-02-16T12:37:00	FR	Other	sea bottom	OBS_Trillium_Compact	120	6D6	250	AWI	Geomar	offline
Z3	A416A	42.6467	6.9634	-2.637	Ligurian Sea	2017-06-25T03:38:00	2018-02-17T01:54:00	FR	Other	sea bottom	OBS_Trillium_240	240	CS5321-22	250	IPGP	IPGP	offline
Z3	A417A	42.8796	7.5178	-2.677	Ligurian Sea	2017-06-17T21:08:00	2018-02-17T12:24:00	FR	Other	sea bottom	OBS_Trillium_Compact	120	6D6	250	AWI	Geomar	offline
Z3	A418A	42.9999	8.0709	-2.632	Ligurian Sea	2017-06-19T13:37:00	2018-02-17T15:05:00	FR	Other	sea bottom	OBS_Trillium_Compact	120	6D6	250	Geomar	Geomar	offline
Z3	A419A	43.2904	8.6009	-2.588	Ligurian Sea	2017-06-23T18:49:00	2018-02-19T04:08:00	IT	Other	sea bottom	OBS_Trillium_240	240	CS5321-22	62.5	IPGP	IPGP	offline
Z3	A420A	43.4537	9.1949	-1.354	Ligurian Sea	2017-06-24T10:13:00	2018-02-19T13:42:00	IT	Other	sea bottom	OBS_Trillium_120	120	6D6	250	Geomar	Geomar	offline
Z3	A421A	41.7153	5.8499	-2.525	Ligurian Sea	2017-06-17T03:30:00	2018-02-15T09:59:00	FR	Other	sea bottom	OBS_Trillium_Compact	120	6D6	250	AWI	Geomar	offline
Z3	A422A	41.9434	6.4101	-2.542	Ligurian Sea	2017-06-22T08:11:00	2018-02-23T00:15:00	FR	Other	sea bottom	OBS_Trillium_240	240	CS5321-22	62.5	IPGP	IPGP	offline
Z3	A423A	42.1784	6.96405	-2.706	Ligurian Sea	2017-06-18T14:48:00	2018-02-16T15:38:00	FR	Other	sea bottom	OBS_Trillium_Compact	120	6D6	250	AWI	Geomar	offline
Z3	A424A	42.4111	7.5153	-2.746	Ligurian Sea	2017-06-18T18:27:00	2018:02-16T22:34:00	FR	Other	sea bottom	OBS_CMG-40	120	MTS	50	Geomar	Geomar	offline
Z3	A425A	42.6471	8.0703	-2.713	Ligurian Sea	2017-06-23T10:57:00	2018-02-21T03:40:00	FR	Other	sea bottom	OBS_Trillium_240	240	CS5321-22	62.5	IPGP	IPGP	offline
Z3	A426A	42.8801	8.6215	-2.564	Ligurian Sea	2017-06-19T00:25:00	2018-02-21T07:57:00	FR	Other	sea bottom	OBS_CMG-40	120	MTS	50	Geomar	Geomar	offline
Z3	A427A	43.119	9.1947	-1.357	Ligurian Sea	2017-06-19T03:53:00	2018-02-19T15:53:00	FR	Other	sea bottom	OBS_CMG-40	120	MTS	50	Geomar	Geomar	offline
Z3	A428A	41.7102	6.9639	-2.734	Ligurian Sea	2017-06-17T08:34:00	2018-02-23T05:36:00	FR	Other	sea bottom	OBS_Trillium_Compact	120	6D6	250	AWI	Geomar	offline
Z3	A429A	41.9434	7.5167	-2.771	Ligurian Sea	2017-06-23T02:18:00	2018-02-22T17:09:00	FR	Other	sea bottom	OBS_Trillium_240	240	CS5321-22	62.5	IPGP	IPGP	offline
Z3	A430A	42.1779	7.9809	-2.752	Ligurian Sea	2017-06-17T16:21:00	2018-02-16T19:51:00	FR	Other	sea bottom	OBS_Trillium_Compact	120	6D6	250	AWI	Geomar	offline
Z3	A431A	41.7096	7.9805	-2.666	Ligurian Sea	2017-06-17T13:14:00	2018-02-22T14:16:00	FR	Other	sea bottom	OBS_CMG-40	120	MCS	50	AWI	Geomar	offline
Z3	A434A	43.8503	9.2299	-1.133	Ligurian Sea	2017-06-24T06:12:00	2018-02-19T11:14:00	IT	Other	sea bottom	OBS_Trillium_Compact	120	6D6	250	Geomar	Geomar	offline
